# Supplementary material for: Sexual and Reproductive Health Services Utilization and Associated Factors among College Students at West Arsi Zone in Oromia Region, Ethiopia
Source: ScientificWorldJournal. 2020 Aug 25;2020:3408789. doi: 10.1155/2020/3408789 (PMC7468662; doi:10.1155/2020/3408789)
Supplement: Supplementary Materials — Supplementary Figure S1: the reasons for not utilizing SRH services among college students in West Arsi Zone, Oromia, Ethiopia, 2019 (n = 215). Supplementary Table S1: utilization of SRH services among college students in West Arsi Zone, Oromia, Ethiopia, 2019. Additional file 1 shows the data used for statistical analysis (CSV, 60.2 kb). Additional file 2 shows a self-administered questioner to assess the SRH services and associated factors among college students (doc., 75.5 kb). [file 3408789.f1.zip › 3408789.f1/Additional file 1 -Data.csv]

ID	Age	sex	F.Adress	liv.with	Year	income	mon.from	Moth.edu	Fath.edu	Moth.Occu	Fath.Occu	mar.stat	evr.heard	ser.und.RH	wher.get.info	whr.get.serv	Yot.Ado.Ri.RH	kn.FP.meth	hear.STI	whi.kno	knowS.S.STI	wha.sign.symp	mode.trasmission	disc.RH.fam.guard	Clubs	Ever.sex	Sex.active	star.sex	use.YFRH	inlast12Mon	Edu.com	FP	Prh.Test	Abort.care	ANC	Condom	VCT	STI	fro.whe.YFRHS	b.c.distance	chose.sex.prov	Ask.pay	working.Hour	lack.sep.room	fear.seen	Income2	utize1.RHS2	Age2	Sex2
372	20	2	2	1	2	300	2	0	1	2	2	1	1	1	1	1	1	1	1	2	1	2	1	1	1	1	1	1	1	1	1	0	0	0	0	1	1	0	2							0	1	1	1
384	20	2	2	2	1	300	2	1	2	1	0	1	1	1	3	1	1	1	1	1	1	1	1	1	1	0	0		1	1	1	0	0	0	0	0	1	0	4							0	1	1	1
80	17	2	2	1	1	300	1	1	0	2	2	1	1	1	3	1	1	1	1	4	0	5		1	1	1	1	1	1	1	0	1	0	0	0	1	0	0	4							0	1	0	1
89	21	1	1	1	3	700	5	2	3	1	1	1	1	1	5	1	0	1	1	1	1	3	3	0	0	1	1	1	1	1	1	0	0	0	0	1	1	1	3							1	1	1	0
365	17	1	2	1	1	200	6	1	3	0	1	1	1	1	3	1	1	1	1	4	0	5		0	1	0	0		0	0										0	1	0	1	1	1	0	0	0	0
250	22	2	2	1	2	200	1	2	3	0	1	1	1	1	5	2	1	1	1	4	1	1	1	0	0	1	1	1	1	1	1	1	1	1	0	0	1	0	4							0	1	1	1
136	19	2	1	2	1	300	2	0	1	0	1	1	1	1	3	1	0	1	1	4	1	3	3	1	1	0	0		1	1	0	0	0	0	0	0	0	0	2							0	1	0	1
135	19	1	2	1	1	300	2	1	2	2	0	1	1	1	3	1	0	1	1	4	1	2	3	0	1	0	0		0	0										0	1	0	0	0	0	0	0	0	0
297	19	1	2	1	1	200	1	0	1	1	0	1	1	1	3	1	1	1	1	3	1	3	2	0	1	0	0		0	0										1	0	0	1	1	1	0	0	0	0
184	19	1	2	1	1	200	1	1	2	2	2	1	1	1	2	1	0	1	1	4	1	1	3	0	0	0	0		0	0										0	0	0	1	0	0	0	0	0	0
301	20	2	2	2	1	700	2	1	0	1	1	1	1	1	1	1	1	1	1	4	0	5		1	1	0	0		0	0										0	1	0	1	0	0	1	0	1	1
501	21	1	1	2	2	500	2	3	3	0	1	1	1	1	6	1	1	1	1	4	1	4	3	0	1	0	0		0	0										1	0	0	0	0	0	1	0	1	0
341	24	2	2	2	2	600	2	3	3	0	1	1	1	1	3	1	0	1	1	2	1	3	2	0	0	1	1	2	1	1	1	1	1	0	0	0	1	1	3							1	1	1	1
99	17	2	1	2	2	700	6	3	3	0	1	1	1	1	2	1	1	1	1	2	1	2	2	0	1	1	1	2	1	1	1	1	1	0	0	0	1	0	3							1	1	0	1
58	19	2	1	2	3	200	2	2	3	2	1	1	1	1	2	1	1	1	1	1	1	1	3	1	0	1	1	1	1	1	0	1	0	0	0	1	0	0	2							0	1	0	1
154	18	2	2	1	2	400	2	0	2	0	1	1	1	1	3	1	0	1	1	4	1	3	3	0	0	0	0		0	0										1	1	0	0	0	0	1	0	0	1
417	22	2	1	2	1	200	2	3	3	0	1	2	1	1	4	1	1	1	1	4	1	2	3	0	1	1	1	1	1	1	1	0	0	0	0	1	1	0	3							0	1	1	1
147	20	1	1	1	3	800	5	1	3	2	1	1	1	1	1	1	1	1	1	1	1	4	4	1	1	1	0	1	1	1	1	0	0	0	0	0	1	0	4							1	1	1	0
488	20	1	1	1	3	200	1	1	1	2	0	1	1	1	3	1	1	1	1	1	1	1	3	0	0	0	0		0	0										0	0	0	1	0	0	0	0	1	0
269	20	2	1	2	1	200	5	3	3	0	1	1	1	1	2	1	1	1	1	1	1	1	3	0	1	1	1	1	1	1	1	1	1	1	1	1	1	0	4							0	1	1	1
114	19	1	2	2	1	300	2	1	2	2	0	1	1	1	3	1	0	1	1	1	1	1	1	0	0	0	0		0	0										0	0	0	1	0	0	0	0	0	0
382	21	2	1	1	2	200	3	2	1	2	2	1	1	1	1	2	0	1	1	4	0	3	3	1	1	0	0		1	1	0	0	0	0	0	0	0	0	2							0	1	1	1
510	19	1	2	1	2	200	2	0	2	1	0	1	1	1	3	1	1	1	1	4	0	5		0	1	0	0		0	0										0	0	0	0	0	0	0	0	0	0
146	19	2	2	2	3	400	2	1	2	2	0	1	1	1	3	1	0	0	1	1	0	2	3	0	0	0	0		0	0										0	1	0	0	0	0	1	0	0	1
217	19	1	1	2	3	2000	2	2	3	1	1	1	1	1	1	1	0	0	1	4	0	2	3	1	1	0	0		1	1	0	0	0	0	0	0	1	0	2							2	1	0	0
199	20	1	2	2	2	500	2	1	1	2	2	1	1	1	3	1	1	1	1	4	0	5		1	1	0	0		0	0										1	0	0	0	0	0	1	0	1	0
475	20	2	2	1	2	200	5	3	2	0	1	1	1	1	3	1	1	1	1	4	1	3	1	1	1	1	1	1	1	1	1	1	1	1	0	0	1	0	3							0	1	1	1
230	21	2	1	1	1	800	2	2	1	2	0	1	1	1	1	1	1	1	1	4	0	5		1	1	1	1	1	1	1	1	0	0	0	0	1	1	0	4							1	1	1	1
45	22	1	2	1	2	400	2	1	1	2	0	1	1	1	3	1	1	1	1	3	1	3	3	1	1	1	1	1	1	1	1	0	0	0	0	1	1	1	2							1	1	1	0
87	20	1	2	1	2	200	1	1	2	0	2	1	1	1	3	1	1	1	1	2	1	1	3	0	0	1	1	1	1	1	1	0	0	0	0	0	1	0	3							0	1	1	0
411	21	1	1	2	3	300	5	3	3	0	1	1	1	1	2	1	1	1	1	1	1	3	3	1	0	1	1	1	1	1	1	0	0	0	0	1	1	0	2							0	1	1	0
3	21	1	1	2	2	500	2	1	1	1	0	1	1	1	3	1	0	1	1	4	1	2	3	1	1	1	0	1	1	1	1	0	0	0	0	0	1	1	3							1	1	1	0
419	19	2	2	2	3	200	3	1	1	0	0	1	1	1	2	1	1	1	1	3	1	2	1	0	0	1	1	1	1	1	1	1	1	1	0	0	1	1	3							0	1	0	1
349	19	1	2	1	1	200	1	3	3	0	1	1	1	1	2	1	1	1	1	4	0	1	3	0	0	0	0		1	1	1	0	0	0	0	0	0	0	1							0	1	0	0
142	20	1	1	1	1	300	2	1	2	2	0	1	1	1	1	2	1	1	1	4	0	2	2	1	1	1	0	1	1	1	1	0	0	0	0	0	1	0	3							0	1	1	0
285	17	2	1	2	1	300	2	1	0	0	2	1	1	1	2	1	1	1	1	3	1	2	1	1	1	1	1	1	1	1	1	1	1	1	0	0	1	0	3							0	1	0	1
493	24	2	1	1	2	300	1	0	0	2	0	1	1	1	2	1	1	1	1	4	0	2	2	1	1	1	1	1	1	1	1	0	0	0	0	1	1	1	3							0	1	1	1
508	21	1	1	2	2	500	2	2	3	0	1	1	1	1	6	1	1	1	1	4	1	4	3	0	1	0	0		0	0										0	1	0	0	0	0	1	0	1	0
476	19	2	2	1	1	300	2	2	3	2	1	1	1	1	2	1	1	1	1	4	0	5		0	1	1	1	2	1	1	1	1	0	0	0	1	1	0	3							0	1	0	1
278	19	2	2	2	3	400	4	1	3	1	0	1	1	1	3	1	0	1	1	2	1	3	2	1	1	1	1	1	1	1	0	1	1	1	1	0	0	0	4							1	1	0	1
401	24	2	2	2	1	300	2	1	3	2	1	1	1	1	3	1	1	1	1	4	1	2	3	1	1	1	1	1	1	1	1	0	0	0	0	1	1	0	3							0	1	1	1
345	20	2	1	1	3	1000	2	2	3	2	1	1	1	1	6	1	1	1	1	4	1	4	3	0	1	0	0		1	1	1	0	0	0	0	0	1	0	2							2	1	1	1
425	20	2	2	1	2	1000	3	2	3	1	1	1	1	1	5	1	1	1	1	4	1	1	2	0	0	1	1	1	1	1	1	0	1	1	1	1	1	0	3							2	1	1	1
497	18	1	2	2	1	1000	1	2	3	1	1	1	1	0					1	1		1	1	0	0	0	0		0	0										0	0	0	0	1	1	2	0	0	0
19	19	2	2	2	2	300	2	3	2	1	0	1	1	1	6	4	0	0	1	1	0	3	3	1	1	0	0		0	0										0	1	0	1	1	1	0	0	0	1
6	23	2	2	1	3	200	3	0	2	2	0	1	1	1	2	1	1	1	1	2	1	2	2	0	0	1	1	1	1	0										1	1	1	1	0	0	0	0	1	1
37	19	2	2	1	1	500	2	1	2	0	1	1	1	1	2	1	0	1	1	4	1	3	3	0	0	1	1	1	1	1	1	1	1	1	0	0	1	1	4							1	1	0	1
210	19	1	2	1	1	200	1	0	2	2	2	1	1	1	5	2	0	1	1	4	1	3	3	0	0	0	0		0	0										1	1	0	1	1	1	0	0	0	0
100	19	1	1	1	1	400	2	3	2	1	1	1	1	1	3	1	1	1	1	4	0	5		0	1	0	0		0	0										0	1	0	1	0	0	1	0	0	0
316	20	2	1	1	1	700	5	0	1	0	1	1	1	1	2	1	1	1	1	4	1	1	3	1	0	0	0		0	0										0	0	0	1	0	0	1	0	1	1
295	21	1	1	1	1	200	1	2	3	1	1	1	1	1	2	1	1	1	1	4	0	5		1	1	1	1	1	1	1	1	0	0	0	0	1	1	0	3							0	1	1	0
56	20	1	1	2	1	200	1	1	3	2	1	1	1	1	3	1	0	0	1	4	0	5		0	1	0	0		0	0										1	0	0	1	0	0	0	0	1	0
176	20	1	1	1	2	300	2	1	2	2	0	1	1	1	2	1	1	1	1	4	1	2	2	0	0	0	0		0	0										1	1	0	1	0	0	0	0	1	0
228	20	2	2	1	1	300	2	2	1	1	0	1	1	1	1	1	1	1	1	2	1	1	1	1	1	0	0		0	0										0	0	0	0	0	0	0	0	1	1
24	20	2	2	2	2	1000	4	2	3	2	1	1	1	1	3	1	1	1	1	4	1	2	1	1	1	1	1	2	1	1	1	1	0	1	0	0	1	1	1							2	1	1	1
192	19	2	1	2	1	300	2	2	3	1	0	1	1	1	3	1	0	1	1	4	1	3	3	1	1	0	0		1	1	0	0	0	0	0	0	0	0	2							0	1	0	1
306	19	2	2	1	2	400	2	1	2	2	1	1	1	1	3	1	1	1	1	4	0	5		0	1	0	0		0	0										0	0	0	0	0	0	1	0	0	1
459	23	1	2	2	1	300	5	1	3	2	0	1	1	1	1	1	1	1	1	4	0	1	2	1	1	1	0	1	1	1	1	0	0	0	0	0	1	0	3							0	1	1	0
320	21	2	2	2	2	400	2	2	0	2	0	1	1	1	2	1	0	1	1	3	1	3	1	1	0	1	0	1	1	1	1	0	0	0	0	0	1	0	3							1	1	1	1
422	21	1	1	1	3	1300	2	1	1	2	2	1	1	1	6	1	0	1	1	1	1	4	4	0	1	0	0		0	0										1	0	0	0	0	0	2	0	1	0
283	20	2	2	1	1	300	1	0	1	0	0	1	1	1	2	1	0	1	1	4	1	3	3	0	0	0	0		0	0										0	0	0	1	0	0	0	0	1	1
406	20	2	1	1	3	500	4	2	3	1	1	1	1	1	3	1	1	1	1	4	1	3	3	1	1	0	0		0	0										0	1	0	1	1	1	1	0	1	1
161	19	2	2	1	2	400	2	0	2	2	0	1	1	1	3	1	1	1	1	4	0	5		0	1	0	0		0	0										1	0	0	0	0	0	1	0	0	1
75	19	1	2	1	2	200	2	1	2	2	1	1	1	1	3	1	1	1	1	4	0	5		0	1	0	0		0	0										1	1	0	0	0	0	0	0	0	0
485	20	2	1	2	1	200	2	1	3	1	1	1	1	1	2	1	1	1	1	1	1	3	3	0	0	1	1	1	1	1	1	1	1	1	0	1	1	0	3							0	1	1	1
206	22	2	1	1	1	800	1	2	3	0	1	1	1	1	5	1	1	1	1	4	1	3	1	1	0	1	1	1	1	1	1	1	1	1	0	1	1	1	5							1	1	1	1
204	19	1	2	1	2	200	2	1	2	2	1	1	1	1	3	1	1	1	1	4	0	5		0	1	0	0		0	0										1	0	0	0	0	0	0	0	0	0
514	19	2	1	1	3	300	2	0	1	2	1	1	1	1	2	1	0	1	1	1	1	1	3	1	0	1	1	1	1	1	0	1	1	0	0	0	1	0	3							0	1	0	1
279	19	1	1	1	1	300	3	1	2	2	1	1	1	1	3	1	0	0	1	4	0	5		0	1	0	0		0	0										0	1	0	1	0	0	0	0	0	0
337	24	2	2	2	1	200	2	3	3	0	1	1	1	1	2	1	1	1	1	3	1	1	3	0	1	1	1	1	1	1	1	0	0	0	0	1	1	1	3							0	1	1	1
346	22	2	1	1	2	400	2	0	1	1	1	1	1	1	3	1	1	1	1	2	1	2	3	0	1	1	0	1	1	1	1	0	0	0	0	0	1	0	3							1	1	1	1
305	23	2	2	2	3	300	5	3	3	0	1	1	1	1	3	1	1	1	1	3	1	3	3	0	1	1	0	1	1	1	1	0	0	0	0	0	1	1	2							0	1	1	1
108	20	2	2	2	1	700	5	0	2	2	1	1	1	1	1	1	1	1	1	4	0	1	2	1	1	0	0		0	0										0	1	0	1	0	0	1	0	1	1
375	19	1	2	2	1	500	2	1	2	2	0	1	1	1	2	1	1	1	1	4	1	3	3	1	0	0	0		0	0										0	1	0	1	0	0	1	0	0	0
134	23	2	1	1	3	300	2	1	3	2	1	1	1	1	2	1	0	1	1	1	1	1	3	1	0	1	0	1	1	0										0	0	0	1	0	0	0	0	1	1
296	22	2	2	2	1	600	1	3	3	0	1	1	1	1	1	2	1	1	1	4	0	2	2	1	1	0	0		1	1	0	0	0	0	0	0	0	0	1							1	1	1	1
35	19	1	2	1	2	200	2	2	2	0	0	1	1	1	3	1	1	1	1	4	0	5		0	1	0	0		0	0										0	1	0	0	0	0	0	0	0	0
431	23	2	1	1	3	500	2	0	0	2	1	2	1	1	2	1	1	1	1	4	1	3	1	0	0	1	0	1	1	0										0	1	1	1	1	0	1	0	1	1
386	20	2	1	2	1	700	5	1	3	1	1	1	1	1	2	1	1	1	1	4	1	3	3	1	0	0	0		0	0										1	0	0	1	0	0	1	0	1	1
412	20	1	2	2	2	200	5	1	1	2	2	1	1	1	6	3	1	1	1	2	1	2	3	0	0	0	0		0	0										1	0	0	0	0	0	0	0	1	0
362	19	2	2	2	3	200	2	1	3	1	1	1	1	1	2	1	1	1	1	1	1	1	3	1	0	1	1	1	1	1	1	1	1	1	0	0	1	0	2							0	1	0	1
300	23	1	1	2	2	800	2	0	0	2	2	1	1	1	6	1	1	1	1	4	1	3	2	1	1	0	0		1	1	0	0	0	0	0	0	1	0	3							1	1	1	0
312	20	2	2	1	2	300	2	0	1	0	1	1	1	1	6	2	0	1	1	4	1	3	3	0	0	0	0		0	0										1	0	0	0	0	0	0	0	1	1
144	22	2	2	1	3	300	3	0	2	2	1	1	1	1	2	1	0	1	1	1	1	2	3	1	1	0	0		0	0										1	1	0	1	0	0	0	0	1	1
235	20	2	1	1	3	1000	2	1	3	0	1	1	1	1	6	1	1	1	1	4	1	4	3	0	1	1	1	2	1	1	1	1	1	0	0	0	1	0	2							2	1	1	1
272	21	1	2	1	1	200	2	0	1	2	0	1	1	1	3	1	1	1	1	4	1	4	3	0	1	0	0		0	0										0	1	0	1	1	1	0	0	1	0
369	19	1	2	1	2	300	2	3	3	0	1	1	1	1	3	1	0	1	1	4	1	3	3	0	0	0	0		0	0										0	1	0	0	0	0	0	0	0	0
168	20	1	1	1	3	800	5	0	1	2	1	1	1	1	3	1	0	1	1	4	1	1	2	0	0	0	0		1	1	1	0	0	0	0	0	1	0	4							1	1	1	0
107	19	1	1	2	1	300	2	1	3	2	1	1	1	1	2	1	0	1	1	4	1	1	1	0	0	0	0		0	0										1	1	0	0	0	0	0	0	0	0
291	19	2	1	1	1	1000	1	1	3	1	0	1	1	1	2	1	0	1	1	4	1	2	3	0	0	1	1	1	1	1	1	1	1	0	0	0	1	0	3							2	1	0	1
484	20	2	1	2	1	300	6	2	1	1	2	1	1	1	6	1	1	1	1	1	1	1	3	0	0	0	0		1	1	1	0	0	0	0	0	0	0	3							0	1	1	1
141	19	2	1	2	3	200	2	1	0	1	0	1	1	1	3	1	1	1	1	4	1	2	2	0	0	0	0		1	1	0	0	0	0	0	0	0	0	1							0	1	0	1
445	20	2	1	2	3	500	2	1	1	2	1	1	1	1	2	1	1	1	1	4	0	2	2	1	0	1	1	2	1	1	1	1	1	0	0	0	1	0	4							1	1	1	1
381	19	2	1	2	1	200	2	2	3	1	1	1	1	1	3	1	0	1	1	4	1	3	3	1	1	1	1	1	1	1	1	1	1	0	0	1	1	0	2							0	1	0	1
393	24	2	2	2	2	600	2	2	3	2	1	1	1	1	3	1	0	0	1	4	0	5		0	1	0	0		1	1	1	0	0	0	1	0	0	0	1							1	1	1	1
67	20	1	1	1	3	100	2	0	1	2	1	1	1	1	3	1	0	1	1	1	1	3	4	0	0	1	1	1	1	1	1	0	0	0	0	0	1	1	2							0	1	1	0
322	20	1	2	1	1	1000	2	1	1	2	2	1	1	1	1	2	0	1	1	4	0	5		1	1	0	0		0	0										1	0	0	0	1	1	2	0	1	0
123	20	1	1	2	3	1000	3	1	2	2	2	1	1	1	3	1	1	1	1	4	1	3	3	1	0	0	0		0	0										0	0	0	0	0	0	2	0	1	0
169	24	2	1	1	3	400	2	2	3	0	1	1	1	1	6	2	1	1	1	4	1	3	1	1	0	1	1	1	1	1	1	1	1	0	0	1	1	0	3							1	1	1	1
241	20	2	2	1	2	1000	2	2	1	0	1	1	1	1	3	1	0	1	1	2	1	2	3	0	1	1	1	1	1	1	1	1	1	0	0	0	1	1	3							2	1	1	1
264	24	2	1	1	1	200	2	0	1	0	0	1	1	1	4	1	1	1	1	1	1	1	3	1	1	1	0	1	1	1	1	0	0	0	0	0	1	1	3							0	1	1	1
13	20	2	1	1	2	200	2	1	3	2	1	1	1	1	3	1	1	1	1	3	1	3	3	0	1	1	1	1	1	1	1	1	1	0	0	1	1	0	4							0	1	1	1
126	20	2	1	2	1	800	2	0	1	0	1	1	1	1	3	1	1	1	1	1	1	1	1	1	1	1	1	1	1	1	1	1	1	1	0	0	1	1	3							1	1	1	1
164	21	1	2	1	1	700	5	1	1	2	2	1	1	1	3	1	0	0	1	4	0	5		0	1	1	0	1	1	1	1	0	0	0	0	0	1	0	4							1	1	1	0
175	21	1	1	1	3	600	5	1	1	2	2	1	1	1	2	1	1	1	1	4	1	1	3	1	0	1	1	1	1	1	1	0	0	0	0	1	1	1	3							1	1	1	0
308	20	1	1	1	3	800	5	1	3	2	1	1	1	1	1	1	1	1	1	1	1	4	4	1	1	1	1	1	1	1	1	0	0	0	0	1	1	0	4							1	1	1	0
266	20	2	1	1	2	300	4	0	1	0	1	1	1	1	2	1	1	1	1	4	0	1	2	1	0	0	0		0	0										0	0	0	0	0	0	0	0	1	1
340	22	2	2	2	1	600	2	1	2	1	1	5	1	1	3	1	1	1	1	3	1	3	3	1	1	1	1	2	1	1	1	0	1	1	0	0	0	0	3							1	1	1	1
186	19	1	1	2	1	500	2	3	2	0	0	1	1	1	2	1	1	1	1	4	1	3	3	1	0	0	0		0	0										0	0	0	1	0	0	1	0	0	0
83	23	2	1	1	3	400	3	1	2	1	1	1	1	1	2	1	1	1	1	4	1	3	2	1	1	1	1	1	1	1	1	0	0	0	0	1	1	0	5							1	1	1	1
277	20	2	2	1	2	300	1	1	1	2	0	1	1	1	3	1	1	1	1	3	1	2	1	0	0	0	0		0	0										1	1	0	1	0	0	0	0	1	1
187	19	1	1	1	2	300	2	3	3	0	1	1	1	1	2	1	0	1	1	1	1	3	2	0	0	0	0		1	1	1	0	0	0	0	0	0	0	2							0	1	0	0
268	20	2	2	1	1	200	2	1	3	1	1	1	1	1	3	1	0	1	1	2	1	3	1	0	1	1	1	1	1	1	1	1	1	1	0	0	1	0	2							0	1	1	1
221	18	2	1	2	2	400	5	0	1	0	1	1	1	1	2	1	1	1	1	4	0	5		0	1	0	0		0	0										0	0	0	0	0	0	1	0	0	1
178	18	1	1	2	2	800	2	3	3	0	1	1	1	1	6	1	1	1	1	4	1	3	2	1	1	0	0		1	1	1	0	0	0	0	0	0	0	4							1	1	0	0
74	20	1	2	2	1	200	2	0	1	0	1	1	1	1	3	1	1	1	1	1	1	3	2	0	0	1	0	1	1	1	1	0	0	0	0	0	1	0	4							0	1	1	0
25	21	1	2	1	3	200	2	1	2	1	1	2	1	1	3	1	1	1	1	3	1	1	3	0	0	0	0		1	1	0	0	0	0	0	0	1	0	4							0	1	1	0
256	20	2	1	1	1	700	2	1	3	2	1	1	1	1	1	1	1	1	1	1	1	3	2	1	1	0	0		0	0										1	1	0	1	0	0	1	0	1	1
156	21	2	1	1	1	500	5	1	3	2	1	1	1	1	3	1	1	1	1	1	1	1	3	1	0	1	1	2	1	1	0	0	1	1	0	1	0	0	2							1	1	1	1
402	20	2	2	1	3	200	2	1	1	1	1	1	1	1	3	1	1	1	1	1	1	1	3	0	0	0	0		0	0										0	1	0	1	0	0	0	0	1	1
448	19	2	1	2	1	200	2	0	2	2	0	1	1	1	1	1	0	1	1	1	1	3	2	1	0	0	0		0	0										0	0	0	1	0	0	0	0	0	1
327	24	2	1	2	1	500	5	1	0	0	1	2	1	1	2	1	1	1	1	4	1	3	2	1	1	1	1	2	1	1	1	0	1	1	1	0	1	0	3							1	1	1	1
104	24	1	1	2	3	800	5	1	0	2	1	1	1	1	3	1	1	1	1	4	1	4	3	1	1	1	1	2	1	1	1	0	0	0	0	1	1	1	4							1	1	1	0
339	19	1	1	2	1	300	6	1	2	2	2	1	1	1	3	1	1	1	1	4	1	3	3	0	0	0	0		0	0										1	0	0	1	1	1	0	0	0	0
160	17	1	1	1	1	300	2	1	3	2	1	1	1	1	3	1	1	1	1	1	1	2	3	1	0	0	0		0	0										1	1	0	0	0	0	0	0	0	0
462	20	2	2	2	3	800	6	2	1	1	2	1	1	1	3	1	0	0	1	4	0	5		0	1	0	0		0	0										1	1	0	0	0	0	1	0	1	1
233	21	2	1	1	1	800	2	0	1	2	0	1	1	1	1	1	1	1	1	4	0	5		1	1	1	1	1	1	1	1	0	0	1	0	1	1	0	3							1	1	1	1
236	24	1	2	1	1	300	2	0	0	2	2	2	1	1	3	1	1	1	1	2	1	3	3	1	1	1	1	2	1	1	1	0	0	0	0	1	1	1	3							0	1	1	0
511	21	1	1	1	3	400	2	1	1	2	2	1	1	1	3	1	0	1	1	4	1	2	3	0	1	1	0	1	1	1	1	0	0	0	0	0	1	1	2							1	1	1	0
328	24	1	2	1	1	500	2	2	3	0	1	1	1	1	6	2	1	1	1	1	1	1	3	0	0	1	0	1	1	1	1	0	0	0	0	0	1	0	4							1	1	1	0
255	20	1	2	1	3	200	1	0	0	2	2	1	1	1	6	1	1	1	1	4	1	5	3	0	1	0	0		0	0										0	1	0	0	0	0	0	0	1	0
127	20	2	1	2	1	1300	2	2	3	1	1	1	1	1	3	1	1	1	1	1	1	1	1	1	1	1	1	1	1	1	1	1	1	1	0	0	1	0	3							2	1	1	1
334	19	2	2	2	3	400	4	2	3	1	0	1	1	1	3	1	0	1	1	2	1	3	2	1	1	0	0		1	1	1	0	0	0	0	0	1	0	2							1	1	0	1
428	17	1	1	2	2	200	5	1	3	0	1	1	1	1	3	1	1	1	1	1	1	3	4	0	1	0	0		0	0										0	0	0	1	1	1	0	0	0	0
441	23	1	2	2	1	500	5	0	0	2	2	1	1	1	3	1	1	1	1	4	1	4	3	0	1	1	0	1	1	0										1	1	1	1	1	1	1	0	1	0
507	18	1	2	1	3	200	2	1	2	2	1	1	1	1	1	1	1	1	1	1	1	1	3	1	1	0	0		0	0										0	0	0	0	0	0	0	0	0	0
174	19	1	2	1	1	200	2	1	2	2	0	1	1	1	6	2	1	1	1	2	1	3	3	0	0	0	0		0	0										1	0	0	1	1	1	0	0	0	0
46	20	2	1	2	1	200	2	3	3	0	2	1	1	1	2	1	1	1	1	1	1	3	3	0	0	1	0	1	1	1	1	0	0	0	0	0	1	0	3							0	1	1	1
442	23	1	2	2	1	300	5	1	3	1	2	1	1	1	1	1	1	1	1	4	0	1	2	1	1	1	1	1	1	1	1	0	0	0	0	1	1	0	3							0	1	1	0
474	20	2	2	1	2	300	2	0	1	2	0	1	1	1	3	1	1	1	1	4	1	3	4	1	1	0	0		0	0										0	0	0	0	0	0	0	0	1	1
44	17	2	2	1	2	200	2	1	2	0	1	1	1	1	4	1	1	1	1	4	1	3	2	1	0	0	0		1	1	0	0	0	0	0	0	0	0	1							0	1	0	1
310	19	1	1	1	2	200	2	3	3	0	1	1	1	1	3	1	0	1	1	4	0	5		0	1	0	0		1	1	1	0	0	0	0	0	0	0	3							0	1	0	0
62	19	1	2	1	3	200	1	2	2	0	1	1	1	1	4	2	1	1	1	4	1	4	4	1	1	0	0		0	0										0	0	0	1	1	1	0	0	0	0
275	20	2	1	1	1	200	2	1	3	2	1	1	1	1	2	1	1	1	1	3	1	2	3	1	0	1	1	1	1	1	1	1	1	1	0	1	1	1	3							0	1	1	1
213	19	1	2	2	3	500	2	3	3	0	1	1	1	1	2	1	1	1	1	2	1	3	3	1	0	0	0		1	1	0	0	0	0	0	0	1	0	1							1	1	0	0
162	20	2	1	2	2	500	2	1	3	2	1	1	1	1	3	1	1	1	1	1	1	1	3	0	0	0	0		1	1	0	0	0	0	0	0	1	0	4							1	1	1	1
276	19	1	2	2	2	200	2	0	2	0	2	1	1	1	2	1	1	1	1	4	0	5		1	1	0	0		0	0										0	0	0	1	0	0	0	0	0	0
274	18	2	2	2	2	400	2	1	1	1	0	1	1	1	2	1	0	1	1	4	0	5		0	1	1	1	2	1	1	1	1	0	0	0	1	1	0	3							1	1	0	1
30	20	2	2	1	2	200	2	2	2	0	1	1	1	1	1	1	1	1	1	2	1	2	1	1	1	1	1	1	1	1	1	0	0	0	0	1	1	0	2							0	1	1	1
314	20	1	2	2	1	1300	2	1	1	2	1	1	1	1	3	1	1	1	1	1	1	3	2	0	0	0	0		0	0										1	0	0	0	0	0	2	0	1	0
51	20	2	1	1	1	200	1	3	3	0	1	1	1	1	1	1	1	1	1	2	1	3	1	1	1	0	0		0	0										0	0	0	0	0	0	0	0	1	1
177	20	1	1	2	3	1000	3	1	2	2	2	1	1	1	3	1	1	1	1	4	1	3	3	1	0	0	0		0	0										0	1	0	0	0	0	2	0	1	0
208	19	1	2	2	1	300	2	2	2	0	1	1	1	1	6	2	1	1	1	1	1	1	3	0	0	0	0		0	0										1	0	0	1	0	0	0	0	0	0
390	19	1	2	1	2	200	2	0	2	1	0	1	1	1	6	2	0	1	1	4	1	1	1	0	0	0	0		0	0										0	1	0	1	1	1	0	0	0	0
298	22	2	2	2	1	200	2	2	1	0	0	1	1	1	1	2	1	1	1	4	0	5		1	0	0	0		0	0										1	1	0	0	1	1	0	0	1	1
92	21	1	2	2	2	500	2	1	1	2	1	1	1	1	3	1	0	1	1	4	1	2	3	1	1	1	0	1	1	1	1	0	0	0	0	0	1	0	3							1	1	1	0
110	19	1	2	1	2	300	2	0	1	2	1	1	1	1	2	1	1	1	1	4	0	3	2	1	0	0	0		1	1	1	0	0	0	0	0	0	0	1							0	1	0	0
450	20	1	2	1	1	300	5	2	1	1	0	1	1	1	5	3	1	1	1	3	1	2	1	1	0	0	0		0	0										0	0	0	1	1	1	0	0	1	0
8	17	2	1	1	1	400	2	2	3	0	1	1	1	1	3	1	1	1	1	1	1	1	2	1	0	0	0		0	0										1	0	0	1	1	1	1	0	0	1
182	19	1	2	1	1	300	2	0	2	2	1	1	1	1	1	4	0	1	1	1	1	1	3	1	1	0	0		0	0										1	1	0	0	0	0	0	0	0	0
14	19	2	1	2	3	200	2	2	3	2	1	1	1	1	3	1	0	0	1	1	0	2	3	1	0	0	0		1	1	0	0	0	0	0	0	0	0	4							0	1	0	1
437	24	2	2	2	2	700	3	1	2	1	1	1	1	1	1	1	0	1	1	4	0	5		1	1	1	1	2	1	1	1	1	1	0	0	0	1	1	2							1	1	1	1
424	23	2	1	2	2	600	2	1	2	1	1	1	1	1	3	1	1	1	1	4	0	5		0	1	1	1	1	1	1	1	0	0	0	0	1	1	0	4							1	1	1	1
124	20	2	2	1	3	400	2	0	2	2	0	1	1	1	3	1	1	1	1	4	1	3	1	1	1	0	0		0	0										0	0	0	0	0	0	1	0	1	1
119	20	2	2	2	3	1300	5	1	3	2	1	1	1	1	4	1	1	1	1	1	1	2	3	1	0	0	0		1	1	0	0	0	0	0	0	0	0	2							2	1	1	1
379	19	2	1	1	1	400	2	2	2	1	0	1	1	1	3	1	1	1	1	4	0	5		0	1	0	0		0	0										1	0	0	1	0	0	1	0	0	1
244	21	1	1	2	3	200	5	2	3	0	1	1	1	1	2	1	1	1	1	1	1	3	3	1	0	1	0	1	1	1	1	0	0	0	0	0	1	0	4							0	1	1	0
262	20	2	1	2	2	1000	5	2	3	2	1	1	1	1	4	1	1	1	1	4	1	3	3	0	0	0	0		1	1	1	0	0	0	0	0	1	0	3							2	1	1	1
509	23	2	1	1	1	500	2	0	0	2	2	2	1	1	2	1	1	1	1	4	1	3	1	0	1	1	1	1	1	1	1	0	1	1	1	1	1	0	3							1	1	1	1
410	19	2	1	2	2	300	2	1	2	2	2	1	1	1	3	1	0	1	1	1	1	4	3	0	1	0	0		1	1	1	0	0	0	0	0	0	0	1							0	1	0	1
50	19	2	1	1	1	300	2	2	2	1	0	1	1	1	1	1	1	1	1	1	1	1	3	1	0	0	0		0	0										1	0	0	1	0	0	0	0	0	1
95	19	1	1	1	1	100	4	1	2	2	0	1	1	1	2	1	1	1	1	3	1	1	1	1	1	0	0		0	0										0	0	0	0	0	0	0	0	0	0
77	20	2	2	1	2	700	2	3	3	0	1	1	1	1	3	1	0	1	1	4	0	5		0	1	1	1	1	1	1	0	0	1	1	0	1	1	0	2							1	1	1	1
229	23	1	1	2	3	400	4	0	1	0	1	1	1	1	2	1	1	1	1	1	1	3	3	0	0	1	1	1	1	1	1	0	0	0	0	1	1	0	3							1	1	1	0
69	17	1	2	2	1	300	1	0	1	0	1	1	1	1	2	1	1	1	1	4	1	1	1	1	0	1	1	1	1	1	1	0	0	0	0	0	1	0	3							0	1	0	0
81	19	2	1	1	1	300	2	1	2	1	1	1	1	1	6	1	1	1	1	1	1	2	1	0	0	0	0		1	1	0	0	0	0	0	0	0	0	1							0	1	0	1
491	20	2	2	2	3	200	2	1	1	2	1	1	1	1	3	1	1	1	1	4	1	3	2	0	1	0	0		0	0										0	1	0	0	0	0	0	0	1	1
252	20	2	1	1	1	500	2	1	3	2	1	1	1	1	2	1	1	1	1	4	0	3	3	0	0	0	0		0	0										0	1	0	0	0	0	1	0	1	1
348	22	2	1	2	3	1000	5	2	3	2	1	1	1	1	2	1	1	1	1	2	1	1	3	0	1	1	1	1	1	1	1	0	0	0	0	1	1	0	3							2	1	1	1
190	20	1	2	1	1	300	2	1	1	2	0	1	1	1	4	2	1	1	1	1	1	3	3	0	0	0	0		0	0										0	1	0	1	1	1	0	0	1	0
333	21	1	1	2	2	300	2	1	1	1	0	1	1	1	2	1	1	1	1	1	1	3	3	1	1	1	0	1	1	1	1	0	0	0	0	0	1	1	1							0	1	1	0
338	19	2	1	2	3	800	5	1	3	2	1	1	1	1	3	1	1	1	1	4	1	1	1	1	0	0	0		1	1	0	0	0	0	0	0	0	0	3							1	1	0	1
47	22	2	2	1	3	200	3	2	3	0	1	1	1	1	2	1	1	1	1	2	1	2	2	0	1	1	1	1	1	1	1	0	0	1	0	1	1	0	3							0	1	1	1
23	21	2	1	1	1	500	2	2	3	0	1	1	1	1	6	2	0	1	1	1	1	3	3	0	1	1	1	1	1	1	1	1	1	1	0	0	1	0	2							1	1	1	1
231	24	2	2	1	2	200	6	1	1	2	0	1	1	1	3	1	1	1	1	4	0	5		0	1	0	0		1	1	0	0	0	0	0	0	0	0	2							0	1	1	1
239	20	2	1	2	1	400	2	3	3	0	1	1	1	1	4	1	1	0	1	1	0	1	3	0	0	1	1	1	1	1	0	0	1	1	1	1	0	0	3							1	1	1	1
463	20	2	2	1	2	300	2	0	1	2	0	1	1	1	3	1	1	1	1	4	1	3	4	1	1	1	1	1	1	1	1	1	1	1	0	1	1	0	3							0	1	1	1
461	22	2	1	2	1	800	5	0	1	2	2	1	1	1	2	1	1	1	1	4	1	2	2	1	1	1	0	1	1	1	1	0	0	0	0	0	1	0	3							1	1	1	1
380	24	1	1	1	3	200	2	2	0	1	1	1	1	1	3	1	1	1	1	4	1	2	3	0	0	1	0	1	1	0										1	1	0	0	0	0	0	0	1	0
121	19	1	1	2	2	200	2	0	2	2	1	1	1	1	2	1	1	1	1	4	1	3	3	0	0	1	0	1	1	1	1	0	0	0	0	0	1	0	2							0	1	0	0
170	23	1	1	2	3	400	4	0	1	2	0	1	1	1	2	1	1	1	1	1	1	3	3	0	0	1	0	1	1	1	1	0	0	0	0	0	1	0	3							1	1	1	0
111	22	2	2	2	2	200	2	3	3	0	1	1	1	1	1	1	1	1	1	4	0	1	2	1	1	0	0		0	0										0	0	0	1	0	0	0	0	1	1
27	17	2	2	2	3	400	4	2	0	1	2	1	1	1	3	1	1	1	1	4	1	3	2	1	1	1	1	1	1	1	0	1	1	0	0	0	0	0	3							1	1	0	1
43	19	2	1	2	3	400	5	3	2	0	0	1	1	1	6	1	0	1	1	4	1	3	3	0	0	0	0		0	0										1	0	0	0	0	0	1	0	0	1
267	24	2	2	2	3	200	2	2	3	2	1	1	1	1	2	1	0	1	1	1	1	1	3	1	1	1	1	2	1	1	1	1	1	0	0	0	1	0	3							0	1	1	1
319	24	2	2	2	3	400	2	3	3	1	0	1	1	1	6	1	1	1	1	4	1	1	3	0	0	1	0	1	1	0										0	1	1	1	1	1	1	0	1	1
426	21	1	1	2	2	1000	2	0	1	2	0	1	1	1	2	1	1	1	1	1	1	3	3	1	1	0	0		0	0										0	0	0	0	0	0	2	0	1	0
139	19	1	2	1	1	300	2	1	3	2	1	1	1	1	3	1	1	0	1	4	0	5		0	1	0	0		0	0										1	1	0	0	0	0	0	0	0	0
153	24	2	1	1	3	300	1	1	3	1	1	2	1	1	6	1	0	1	1	4	1	1	4	1	0	1	0	2	1	1	1	0	0	0	0	0	1	0	2							0	1	1	1
468	20	1	2	2	3	500	2	0	1	0	1	1	1	0	6	2	1	1	1	2	1	3	3	1	0	0	0		1	1	1	0	0	0	0	0	1	0	3							1	1	1	0
342	20	1	2	2	1	1000	1	3	3	0	1	1	1	0					1	1		1	1	0	0	0	0		0	0										1	1	0	0	1	1	2	0	1	0
181	19	2	1	1	1	400	2	1	2	2	0	1	1	1	3	1	0	0	1	4	0	2	3	0	1	0	0		0	0										0	0	0	1	0	0	1	0	0	1
36	19	2	2	2	2	400	2	1	3	1	1	1	1	1	3	1	0	1	1	4	1	3	3	1	1	1	1	2	1	1	0	0	1	1	1	0	0	0	3							1	1	0	1
237	24	2	1	2	3	800	5	2	1	0	1	1	1	1	6	1	1	1	1	4	1	1	1	1	1	1	1	2	1	1	1	1	1	1	0	0	1	1	4							1	1	1	1
197	20	1	2	1	1	500	2	1	3	2	1	1	1	1	6	2	1	1	1	1	1	1	3	0	0	0	0		0	0										1	0	0	0	0	0	1	0	1	0
366	20	1	2	1	1	200	6	1	1	2	1	1	1	1	3	1	1	1	1	4	1	2	3	0	1	1	1	1	1	1	1	0	0	0	0	1	1	1	4							0	1	1	0
408	23	2	2	2	3	400	2	2	1	0	1	1	1	1	6	1	1	1	1	4	1	1	3	0	0	0	0		1	1	0	0	0	0	0	0	0	0	5							1	1	1	1
140	20	2	1	2	3	200	2	3	3	0	1	1	1	1	3	1	1	1	1	1	1	3	3	1	0	0	0		1	1	1	0	0	0	0	0	0	0	5							0	1	1	1
165	19	1	1	1	1	200	2	0	1	0	1	1	1	1	2	1	1	1	1	1	1	1	1	1	1	1	1	1	1	1	1	0	0	0	0	0	1	0	4							0	1	0	0
447	19	2	2	2	2	1000	2	0	1	0	1	1	1	1	1	1	1	1	1	1	1	3	3	1	1	0	0		1	1	0	0	0	0	0	0	0	0	1							2	1	0	1
125	20	2	1	1	2	200	2	1	0	2	2	1	1	1	3	1	1	1	1	3	1	3	3	0	1	0	0		1	1	1	0	0	0	0	0	1	0	1							0	1	1	1
356	19	1	1	1	1	100	4	2	2	1	1	1	1	1	2	1	1	1	1	3	1	1	1	1	1	1	1	1	1	1	1	0	0	0	0	1	1	0	4							0	1	0	0
499	18	1	1	2	3	300	5	3	0	0	0	1	1	1	1	1	0	1	1	1	1	3	3	1	1	0	0		1	1	1	0	0	0	0	0	0	0	1							0	1	0	0
318	20	2	1	2	2	500	2	0	1	1	1	1	1	1	2	1	1	1	1	4	1	3	3	0	1	1	1	1	1	1	1	1	1	1	0	1	1	1	2							1	1	1	1
34	21	2	1	1	3	700	1	3	3	0	1	1	1	1	1	1	1	1	1	4	0	3	3	1	1	1	0	1	1	1	1	0	0	0	0	0	1	0	3							1	1	1	1
201	21	1	1	2	2	1000	2	1	1	1	2	1	1	1	2	1	1	1	1	1	1	3	3	1	1	1	0	1	1	1	1	0	0	0	0	0	1	1	2							2	1	1	0
52	20	1	1	2	2	700	2	2	2	1	0	1	1	1	3	1	1	1	1	1	1	2	3	1	0	0	0		0	0										0	1	0	0	0	0	1	0	1	0
486	19	2	1	2	3	400	5	0	2	2	1	1	1	1	6	1	0	1	1	4	1	3	3	0	0	0	0		0	0										1	1	0	0	0	0	1	0	0	1
280	24	1	1	1	2	200	1	0	1	0	1	1	1	1	2	1	1	0	1	2	0	3	3	1	1	1	1	2	1	1	1	0	0	0	0	1	1	0	5							0	1	1	0
358	24	2	2	2	3	400	4	0	2	0	2	1	1	1	3	1	0	1	1	4	0	5		0	1	1	0	1	1	0										0	1	0	1	1	1	1	0	1	1
198	19	1	1	2	1	200	2	1	2	2	1	1	1	1	2	1	0	1	1	1	1	2	3	0	1	0	0		0	0										1	0	0	0	0	0	0	0	0	0
307	22	2	1	1	1	300	1	2	3	0	1	1	1	1	2	1	1	1	1	4	1	3	1	0	0	0	0		0	0										1	1	0	0	0	0	0	0	1	1
225	20	2	2	1	2	700	5	0	1	2	2	1	1	1	6	1	1	1	1	1	1	1	1	0	0	0	0		0	0										0	0	0	0	0	0	1	0	1	1
427	22	2	2	2	2	200	5	1	3	0	1	1	1	1	3	1	0	1	1	4	1	2	3	0	1	1	1	2	1	1	1	1	1	1	0	1	1	1	1							0	1	1	1
68	23	1	1	1	3	700	5	0	1	0	0	1	1	1	3	1	1	1	1	4	1	3	3	0	0	1	0	1	1	1	1	0	0	0	0	0	1	0	3							1	1	1	0
158	20	2	2	2	3	500	2	0	2	2	1	1	1	1	3	1	1	0	1	4	0	3	1	0	0	0	0		0	0										1	1	0	0	0	0	1	0	1	1
98	19	1	2	1	1	300	2	2	2	0	1	1	1	1	6	2	1	1	1	2	1	3	3	0	0	0	0		0	0										0	1	0	1	1	1	0	0	0	0
249	21	2	1	2	2	900	3	1	3	2	1	1	1	1	4	2	0	1	1	4	1	4	3	1	1	1	1	1	1	1	1	1	0	0	0	1	1	0	3							1	1	1	1
118	17	2	1	2	2	200	2	2	3	1	1	1	1	1	1	1	1	1	1	4	1	2	2	1	1	1	1	1	1	1	1	1	1	0	0	1	1	0	1							0	1	0	1
495	18	2	2	1	1	400	2	1	2	0	0	1	1	1	3	1	1	1	1	4	0	5		0	1	0	0		0	0										1	0	0	1	0	0	1	0	0	1
40	22	2	2	2	1	200	2	0	1	2	0	1	1	1	1	2	1	1	1	4	0	5		1	0	0	0		0	0										1	0	0	0	1	1	0	0	1	1
378	21	2	2	2	2	1000	5	1	2	2	1	1	1	1	3	1	1	1	1	3	1	1	2	1	1	1	0	1	1	1	1	0	0	0	0	0	1	0	3							2	1	1	1
79	21	2	2	2	1	200	2	0	2	2	1	1	1	1	1	2	1	1	1	1	1	2	2	1	0	0	0		0	0										1	0	0	1	0	0	0	0	1	1
284	18	2	1	1	1	200	2	1	3	2	0	1	1	1	3	1	1	1	1	1	1	1	3	1	0	0	0		0	0										1	1	0	1	0	0	0	0	0	1
439	24	2	2	2	2	700	3	3	3	0	1	1	1	1	1	1	0	1	1	4	0	5		1	1	1	1	2	1	1	1	1	1	1	0	0	1	1	1							1	1	1	1
506	18	2	2	2	3	300	2	0	1	0	1	1	1	1	2	1	0	1	1	2	1	2	2	1	1	1	1	1	1	1	1	1	1	1	0	0	1	1	2							0	1	0	1
352	20	2	1	1	1	200	2	2	3	2	1	1	1	1	6	1	1	1	1	1	1	4	4	1	0	1	1	1	1	1	0	1	1	1	0	1	0	0	4							0	1	1	1
282	19	2	2	1	1	200	4	1	2	1	0	1	1	1	6	4	1	1	1	4	1	3	3	1	0	0	0		0	0										0	0	0	1	1	1	0	0	0	1
9	20	2	1	1	2	500	1	3	3	0	1	1	1	1	4	1	1	1	1	4	1	1	2	1	0	0	0		1	1	1	0	0	0	0	0	1	0	1							1	1	1	1
53	20	1	1	2	1	200	2	1	2	2	1	1	1	1	3	1	1	1	1	4	1	1	3	1	0	1	0	1	1	1	1	0	0	0	0	0	1	1	5							0	1	1	0
21	19	2	1	2	3	400	2	0	2	2	2	1	1	1	3	1	0	0	1	1	0	2	3	0	0	0	0		0	0										0	1	0	0	0	0	1	0	0	1
453	17	1	1	1	2	300	3	0	0	2	2	1	1	1	3	1	1	1	1	3	1	3	2	0	0	0	0		1	1	1	0	0	0	0	0	0	0	1							0	1	0	0
354	20	2	2	2	3	500	2	1	1	2	0	1	1	1	2	1	1	1	1	1	1	2	4	0	0	0	0		0	0										0	0	0	0	0	0	1	0	1	1
41	20	1	2	1	2	700	5	1	2	1	2	1	1	1	3	1	1	0	1	2	0	3	4	0	0	0	0		0	0										0	0	0	1	0	0	1	0	1	0
335	24	2	1	2	1	300	2	2	3	2	1	2	1	1	1	1	1	1	1	1	1	3	3	1	1	1	1	1	1	1	1	0	1	1	1	1	1	0	4							0	1	1	1
180	20	1	2	1	2	400	2	2	2	1	1	1	1	1	4	2	1	1	1	1	1	3	3	0	0	0	0		0	0										1	1	0	1	1	1	1	0	1	0
219	20	2	2	1	3	300	1	2	1	0	1	1	1	1	6	2	0	0	1	4	0	5		0	1	0	0		0	0										1	1	0	1	1	1	0	0	1	1
482	20	2	2	1	1	300	1	2	0	1	1	1	1	1	5	2	0	1	1	4	1	3	3	0	0	0	0		0	0										1	0	0	1	1	1	0	0	1	1
223	20	2	2	1	2	200	2	1	1	2	2	1	1	1	3	1	0	1	1	2	1	2	3	0	1	0	0		0	0										0	1	0	1	0	0	0	0	1	1
22	20	2	1	2	1	700	2	3	3	0	1	1	1	1	3	1	1	1	1	1	1	1	1	1	1	0	0		1	1	1	0	0	0	0	0	0	0	4							1	1	1	1
101	17	2	2	1	1	300	2	2	1	1	0	1	1	1	2	1	1	1	1	4	0	4	4	1	0	0	0		1	1	0	0	0	0	0	0	0	0	3							0	1	0	1
360	21	1	1	2	2	700	2	2	1	1	0	1	1	1	4	1	0	1	1	4	1	3	3	0	0	0	0		0	0										0	1	0	0	0	0	1	0	1	0
88	20	2	2	2	3	200	2	2	2	0	0	1	1	1	6	2	1	1	1	4	1	3	2	0	0	0	0		0	0										0	1	0	0	0	0	0	0	1	1
10	23	1	1	1	3	700	5	0	2	0	1	1	1	1	3	1	1	1	1	4	1	3	3	0	0	1	1	1	1	0										0	1	0	1	1	1	1	0	1	0
292	21	1	1	1	3	700	5	3	3	0	1	1	1	1	5	1	0	1	1	1	1	3	3	0	0	1	0	1	1	1	1	0	0	0	0	0	1	0	3							1	1	1	0
421	20	2	1	2	3	500	5	3	3	0	1	1	1	1	3	1	1	1	1	1	1	1	1	1	0	1	1	1	1	1	1	1	1	0	0	1	0	0	2							1	1	1	1
215	20	2	1	2	1	200	5	0	1	0	1	1	1	1	2	1	1	1	1	1	1	1	3	0	0	0	0		0	0										0	0	0	0	0	0	0	0	1	1
189	17	1	1	2	2	800	2	3	3	0	1	1	1	1	6	1	1	1	1	4	1	3	2	1	1	0	0		1	1	1	0	0	0	0	0	1	0	4							1	1	0	0
492	19	2	1	2	2	300	2	1	2	2	1	1	1	1	6	2	0	1	1	1	1	3	3	0	0	0	0		0	0										0	1	0	0	0	0	0	0	0	1
466	21	2	1	1	3	300	3	3	2	1	1	1	1	1	2	1	0	1	1	1	1	2	3	1	1	0	0		0	0										1	1	0	1	1	1	0	0	1	1
5	22	2	1	1	1	300	5	3	3	0	1	1	1	1	5	1	1	1	1	4	1	2	3	1	0	0	0		0	0										1	0	0	0	0	0	0	0	1	1
73	18	2	2	2	2	500	2	1	1	2	2	1	1	1	6	2	1	1	1	1	1	1	2	0	1	1	1	1	1	1	1	1	1	0	0	1	1	0	1							1	1	0	1
502	19	1	2	2	2	500	2	2	2	0	1	1	1	1	3	1	0	1	1	4	1	3	3	0	0	0	0		0	0										0	0	0	0	0	0	1	0	0	0
130	24	2	1	1	3	400	2	2	3	2	1	1	1	1	6	2	1	1	1	4	1	3	1	1	0	1	1	1	1	1	1	1	1	1	0	0	1	1	1							1	1	1	1
220	22	2	1	2	1	600	5	1	3	0	0	1	1	1	6	2	1	1	1	4	1	3	4	0	0	1	1	1	1	1	1	1	1	0	0	0	1	1	2							1	1	1	1
258	19	1	2	1	1	300	2	0	2	2	0	1	1	1	6	2	1	1	1	2	1	3	3	0	0	0	0		0	0										1	1	0	1	1	1	0	0	0	0
115	20	1	1	2	3	700	5	3	3	0	0	1	1	1	5	2	1	1	1	3	1	3	3	0	0	0	0		1	1	1	0	0	0	0	0	1	0	3							1	1	1	0
42	24	2	1	2	1	200	2	2	3	2	1	2	1	1	1	1	1	1	1	1	1	3	3	1	1	1	1	1	1	1	1	0	1	1	1	1	1	1	4							0	1	1	1
464	20	2	2	1	3	400	2	0	1	2	0	1	1	1	3	1	1	1	1	4	1	3	1	1	1	1	1	1	1	1	1	1	1	1	0	0	1	0	3							1	1	1	1
32	20	2	1	1	3	200	5	3	3	0	1	1	1	1	2	1	0	1	1	2	1	3	2	0	0	1	1	1	1	1	1	0	0	0	0	1	1	0	1							0	1	1	1
179	20	1	2	1	2	300	2	0	1	2	0	1	1	1	3	1	1	0	1	4	0	3	3	0	0	0	0		1	1	0	0	0	0	0	0	1	0	3							0	1	1	0
364	18	2	1	1	1	400	2	1	3	0	1	1	1	1	3	1	1	1	1	1	1	1	3	1	0	0	0		0	0										1	0	0	1	0	0	1	0	0	1
353	20	2	2	2	3	500	2	2	0	1	1	1	1	1	3	1	1	0	1	4	0	3	1	0	0	0	0		0	0										1	0	0	0	0	0	1	0	1	1
195	19	1	1	2	1	200	2	0	2	2	1	1	1	1	6	1	1	1	1	2	1	1	3	0	1	0	0		0	0										0	0	0	1	0	0	0	0	0	0
477	21	1	1	1	3	400	2	0	1	0	1	1	1	1	3	1	0	1	1	4	1	4	3	0	1	0	0		0	0										0	0	0	0	1	1	1	0	1	0
137	19	1	1	1	3	200	2	1	3	1	1	1	1	1	2	1	1	0	1	4	0	2	1	1	1	0	0		0	0										1	1	0	0	0	0	0	0	0	0
455	20	2	2	2	3	500	2	1	1	2	2	1	1	1	2	1	0	1	1	4	1	1	1	0	1	1	1	1	1	1	1	1	1	1	0	1	1	0	3							1	1	1	1
11	20	2	1	2	3	500	2	2	3	2	0	1	1	1	2	1	0	1	1	4	0	1	3	0	1	1	1	1	1	1	1	1	1	1	0	1	1	0	3							1	1	1	1
91	23	1	1	1	2	300	1	1	3	2	1	1	1	1	3	1	1	1	1	2	1	2	3	1	1	1	0	1	1	1	1	0	0	0	0	0	1	0	5							0	1	1	0
329	19	1	2	1	2	200	1	2	2	0	1	1	1	1	2	1	0	1	1	4	0	5		0	1	0	0		0	0										1	0	0	1	0	0	0	0	0	0
251	23	1	2	2	3	1000	5	1	3	0	1	1	1	1	3	1	1	1	1	3	1	3	3	0	0	1	0	1	1	1	1	0	0	0	0	0	1	0	2							2	1	1	0
82	21	2	1	1	3	400	2	3	3	0	1	1	1	1	3	1	1	1	1	4	1	3	3	0	1	1	1	2	1	1	1	1	1	1	0	1	1	1	4							1	1	1	1
434	21	2	1	1	2	400	1	1	3	1	1	1	1	1	2	1	1	1	1	1	1	3	4	0	1	0	0		0	0										0	0	0	0	1	1	1	0	1	1
214	21	1	1	2	2	700	2	1	1	2	1	1	1	1	4	1	0	1	1	4	1	3	3	0	0	1	1	1	1	1	1	0	0	0	0	1	1	0	4							1	1	1	0
270	22	2	2	2	2	600	2	3	3	0	1	1	1	1	3	1	1	1	1	3	1	3	3	1	0	1	1	1	1	1	0	1	1	0	0	1	0	0	4							1	1	1	1
433	20	2	1	2	1	300	2	3	3	1	1	1	1	1	3	1	1	1	1	4	0	5		1	1	0	0		0	0										1	1	0	0	0	0	0	0	1	1
261	24	2	1	2	1	500	3	1	3	2	1	2	1	1	3	1	1	1	1	3	1	3	3	1	0	1	0	1	1	0										1	1	0	0	0	0	1	0	1	1
38	19	2	1	2	1	200	2	3	2	0	0	1	1	1	1	1	0	1	1	1	1	3	2	1	0	0	0		0	0										0	0	0	1	0	0	0	0	0	1
505	18	2	2	1	2	400	5	2	2	1	0	1	1	1	3	1	1	1	1	4	1	3	1	1	1	0	0		0	0										0	0	0	0	0	0	1	0	0	1
287	23	1	1	1	2	300	2	1	1	2	1	1	1	1	3	1	1	1	1	4	1	3	4	0	0	1	1	1	1	1	1	0	0	0	0	1	1	0	3							0	1	1	0
205	19	2	2	1	1	200	4	1	2	1	1	1	1	1	6	4	1	1	1	4	1	3	3	1	0	0	0		0	0										1	0	0	1	1	1	0	0	0	1
227	20	1	1	1	1	1000	5	1	1	2	0	1	1	1	2	1	0	1	1	1	1	3	3	0	1	1	0	1	1	1	1	0	0	0	0	0	1	0	3							2	1	1	0
332	17	2	1	1	3	300	3	0	1	0	1	1	1	1	2	1	0	1	1	1	1	2	3	1	1	1	1	1	1	1	1	1	1	0	0	0	1	0	3							0	1	0	1
281	24	2	1	2	2	200	5	0	0	2	0	2	1	1	3	1	0	1	1	2	1	3	1	0	0	1	0	2	1	1	1	0	0	0	0	0	1	0	3							0	1	1	1
57	19	1	1	1	1	400	1	2	2	1	1	1	1	1	3	1	1	1	1	4	0	5		0	1	0	0		0	0										0	0	0	1	0	0	1	0	0	0
96	20	1	1	1	3	800	5	2	3	0	1	1	1	1	3	1	0	1	1	4	1	1	2	0	0	1	0	1	1	1	1	0	0	0	0	0	1	0	4							1	1	1	0
273	22	2	1	2	3	300	2	2	3	0	1	1	1	1	6	2	0	1	1	4	1	4	3	0	0	0	0		0	0										0	0	0	1	1	1	0	0	1	1
17	20	1	2	2	3	300	2	1	2	0	1	1	1	1	2	1	1	1	1	4	1	3	2	0	0	1	0	2	1	1	1	0	0	0	0	0	1	1	1							0	1	1	0
151	20	1	2	2	2	500	1	0	2	2	1	1	1	1	3	1	1	1	1	4	1	3	1	1	0	0	0		0	0										1	1	0	1	0	0	1	0	1	0
444	24	2	1	1	1	300	3	3	3	0	1	1	1	1	2	1	0	1	1	2	1	2	4	0	0	1	1	1	1	1	1	0	0	0	0	1	1	0	3							0	1	1	1
55	21	2	2	2	1	400	2	1	3	2	1	1	1	1	3	1	0	0	1	4	0	5		0	1	0	0		0	0										1	0	0	0	0	0	1	0	1	1
20	21	1	2	2	1	300	2	3	3	0	1	1	1	1	3	1	1	0	1	4	0	5		0	1	1	0	1	1	1	1	0	0	0	0	0	1	1	5							0	1	1	0
59	20	2	1	2	3	200	2	2	3	1	0	1	1	1	3	1	1	1	1	1	1	3	3	1	0	1	1	1	1	1	1	0	1	1	1	1	0	0	3							0	1	1	1
503	22	1	1	2	3	200	3	0	0	1	2	2	1	1	2	1	1	0	1	4	0	1	3	1	0	0	0		0	0										0	1	0	1	1	0	0	0	1	0
63	23	2	1	2	1	400	2	3	3	0	1	2	1	1	6	2	1	1	1	4	1	2	3	1	1	1	1	2	1	1	1	1	0	0	0	0	1	0	1							1	1	1	1
212	23	2	1	2	2	2000	2	2	2	1	0	1	1	1	3	1	0	1	1	1	1	2	1	0	0	1	1	1	1	1	1	0	0	0	0	1	1	1	4							2	1	1	1
294	20	2	1	1	3	800	5	3	3	0	1	1	1	1	3	1	0	1	1	2	1	2	2	0	0	1	1	2	1	1	0	1	1	0	0	1	1	0	4							1	1	1	1
93	24	2	2	2	2	200	2	3	3	0	1	1	1	1	2	1	0	0	1	4	0	5		0	1	1	1	1	1	1	1	0	0	0	0	1	1	0	3							0	1	1	1
185	19	2	1	2	3	400	2	1	2	2	2	1	1	1	3	1	0	0	1	1	0	2	3	0	0	0	0		0	0										1	0	0	0	0	0	1	0	0	1
414	20	2	2	1	2	300	2	3	1	0	1	1	1	1	6	2	0	1	1	4	1	3	3	0	0	0	0		0	0										0	1	0	0	0	0	0	0	1	1
415	19	1	1	1	2	1000	2	1	2	2	2	1	1	1	3	1	1	1	1	1	1	2	3	1	0	0	0		0	0										1	1	0	0	0	0	2	0	0	0
331	23	1	2	1	3	200	2	1	3	0	1	1	1	1	3	1	0	1	1	2	1	3	2	1	0	1	1	1	1	1	1	0	0	0	0	1	1	0	3							0	1	1	0
409	19	1	2	2	3	300	4	1	2	2	1	1	1	1	6	1	1	1	1	4	1	3	3	1	0	0	0		1	1	1	0	0	0	0	0	0	0	2							0	1	0	0
460	24	2	2	2	3	400	2	1	3	1	1	1	1	1	6	2	1	1	1	4	1	3	1	1	0	1	1	1	1	1	1	1	1	0	0	0	1	1	3							1	1	1	1
245	19	1	1	2	2	200	5	2	3	0	1	1	1	1	3	1	1	1	1	1	1	3	4	0	1	0	0		0	0										1	1	0	1	1	1	0	0	0	0
404	20	1	1	1	2	300	2	0	2	2	1	1	1	1	2	1	1	1	1	2	1	3	3	1	0	0	0		0	0										0	1	0	1	0	0	0	0	1	0
479	19	1	1	1	1	300	2	1	2	2	1	1	1	1	1	1	1	1	1	1	1	1	3	1	0	0	0		0	0										0	1	0	1	0	0	0	0	0	0
66	19	1	2	1	1	200	1	2	2	1	0	1	1	1	2	1	0	1	1	4	1	1	1	0	0	0	0		0	0										0	0	0	1	0	0	0	0	0	0
49	20	1	1	2	1	700	2	2	3	1	0	1	1	1	6	1	1	1	1	4	1	2	1	0	0	0	0		1	1	0	0	0	0	0	0	1	0	1							1	1	1	0
351	19	2	2	2	3	200	2	1	2	2	2	1	1	1	3	1	0	0	1	1	0	2	3	1	0	1	1	1	1	1	0	1	1	0	0	1	0	0	4							0	1	0	1
311	20	2	2	2	3	300	2	1	1	1	2	1	1	1	2	1	1	1	1	1	1	2	4	0	0	1	0	1	1	1	1	0	0	0	0	0	1	0	5							0	1	1	1
490	19	1	1	2	1	700	6	0	2	0	1	1	1	1	2	1	1	1	1	2	1	2	2	0	0	0	0		0	0										1	0	0	0	0	0	1	0	0	0
257	19	1	2	1	1	300	2	2	2	0	0	1	1	1	1	4	0	1	1	1	1	1	3	1	1	0	0		0	0										0	1	0	0	0	0	0	0	0	0
452	22	2	2	2	1	200	2	0	1	0	0	1	1	1	1	2	1	1	1	4	0	5		1	1	1	1	1	1	1	1	1	1	1	0	0	1	1	4							0	1	1	1
449	20	1	1	1	1	200	2	3	3	0	1	1	1	1	2	1	1	1	1	4	0	5		1	1	1	0	1	1	1	1	0	0	0	0	0	1	1	1							0	1	1	0
429	23	2	1	1	1	500	2	0	1	2	0	2	1	1	2	1	1	1	1	4	1	3	1	0	1	1	1	1	1	1	1	0	0	0	0	1	1	0	4							1	1	1	1
109	20	2	1	2	2	1000	5	3	3	0	1	1	1	1	4	1	1	1	1	4	1	3	3	0	0	0	0		1	1	1	0	0	0	0	0	1	0	3							2	1	1	1
418	18	2	1	1	1	200	2	1	3	2	1	1	1	1	3	1	0	1	1	4	1	1	3	0	1	0	0		0	0										1	0	0	0	0	0	0	0	0	1
167	19	2	1	2	2	300	2	2	2	0	1	1	1	1	6	2	0	1	1	1	1	3	3	0	0	0	0		0	0										1	1	0	0	0	0	0	0	0	1
103	23	2	1	2	3	200	1	1	1	2	2	1	1	1	2	1	1	1	1	4	0	1	2	1	1	1	1	1	1	0										1	1	1	1	1	1	0	0	1	1
496	21	2	2	1	1	500	5	1	2	2	1	1	1	1	3	1	1	1	1	1	1	1	3	1	0	1	1	1	1	1	0	1	1	0	0	1	1	0	2							1	1	1	1
391	18	2	2	2	3	200	2	2	3	2	1	1	1	1	2	1	0	1	1	1	1	1	3	1	1	1	1	1	1	1	1	1	1	1	0	0	1	1	3							0	1	0	1
343	21	2	1	1	3	400	2	1	3	1	1	1	1	1	3	1	1	1	1	4	1	3	3	0	1	1	1	2	1	1	1	1	1	0	0	1	1	0	3							1	1	1	1
173	20	2	2	2	3	700	2	0	1	2	1	1	1	1	6	2	1	1	1	4	1	3	2	1	0	1	1	1	1	1	1	1	0	0	0	1	1	0	1							1	1	1	1
405	24	1	1	2	3	800	5	1	0	1	2	1	1	1	3	1	1	1	1	4	1	4	3	1	1	1	0	2	1	1	1	0	0	0	0	0	1	0	3							1	1	1	0
361	21	1	1	2	2	500	2	0	0	2	2	1	1	1	3	1	0	1	1	4	1	4	3	1	1	0	0		0	0										1	1	0	0	1	1	1	0	1	0
4	20	1	2	1	1	1000	2	1	2	1	0	1	1	1	1	2	0	1	1	4	0	5		1	1	1	1	1	1	1	1	0	0	0	0	1	1	0	3							2	1	1	0
246	19	1	1	2	2	300	2	2	3	0	1	1	1	1	2	1	1	1	1	1	1	2	2	1	0	0	0		1	1	1	0	0	0	0	0	1	0	3							0	1	0	0
54	20	2	1	1	1	1000	2	1	3	2	0	1	1	1	3	1	1	1	1	4	1	2	3	0	1	1	1	1	1	1	1	1	1	1	0	0	1	0	3							2	1	1	1
489	20	2	1	1	2	300	2	1	2	1	0	1	1	1	5	2	1	1	1	1	1	3	3	0	0	0	0		1	1	0	0	0	0	0	0	0	0	3							0	1	1	1
203	20	1	2	1	2	200	2	1	1	1	2	1	1	1	2	1	1	1	1	4	1	3	3	1	0	1	0	2	1	1	1	0	0	0	0	0	1	0	3							0	1	1	0
122	23	1	1	2	3	400	4	0	1	2	2	1	1	1	2	1	1	1	1	1	1	3	3	0	0	1	0	1	1	0										1	1	1	0	0	0	1	0	1	0
128	22	2	1	2	3	200	2	1	3	1	1	2	1	1	4	1	1	1	1	4	1	2	3	0	0	0	0		0	0										1	0	0	1	0	0	0	0	1	1
209	19	2	2	1	2	400	5	0	2	2	1	1	1	1	6	1	1	1	1	1	1	2	4	1	0	0	0		0	0										0	1	0	1	0	0	1	0	0	1
373	23	2	2	1	2	200	6	0	1	2	0	1	1	1	3	1	1	1	1	4	0	5		0	1	1	1	1	1	1	1	0	0	1	0	1	1	0	4							0	1	1	1
191	18	2	1	1	1	400	2	1	3	0	1	1	1	1	3	1	0	1	1	4	1	1	3	0	1	0	0		0	0										1	1	0	0	0	0	1	0	0	1
430	24	2	2	2	3	200	2	1	2	1	1	1	1	1	2	1	0	1	1	2	1	2	2	1	1	1	1	1	1	1	1	0	0	0	0	1	1	0	2							0	1	1	1
394	19	2	2	1	2	200	2	2	2	2	0	1	1	1	2	1	0	1	1	1	1	1	3	1	1	0	0		1	1	1	0	0	0	0	0	1	0	2							0	1	0	1
86	19	2	1	2	1	300	2	2	3	1	1	1	1	1	2	1	1	1	1	4	0	1	3	1	0	0	0		1	1	1	0	0	0	0	0	1	0	2							0	1	0	1
94	19	2	1	1	2	1000	2	1	2	1	1	1	1	1	2	1	1	1	1	2	1	2	3	0	1	1	1	2	1	1	1	1	1	0	0	0	1	0	4							2	1	0	1
290	24	2	2	2	1	200	2	2	3	1	1	1	1	1	2	1	0	0	1	4	0	2	3	0	0	1	1	1	1	1	1	0	0	0	0	1	1	0	4							0	1	1	1
398	19	1	2	1	1	300	1	3	3	0	1	1	1	1	5	2	1	1	1	4	1	2	2	0	0	0	0		1	1	1	0	0	0	0	0	1	0	1							0	1	0	0
120	18	2	1	1	3	400	2	2	3	1	1	1	1	1	6	1	1	1	1	1	1	3	3	1	0	0	0		0	0										0	1	0	1	0	0	1	0	0	1
371	19	2	2	1	2	300	2	0	1	2	1	1	1	1	3	1	0	1	1	4	1	3	3	1	0	0	0		1	1	0	0	0	0	0	0	0	0	3							0	1	0	1
317	24	2	1	2	1	300	5	2	3	1	1	1	1	1	6	3	1	1	1	2	1	3	1	0	0	1	1	1	1	1	1	1	1	1	0	0	1	0	3							0	1	1	1
313	19	1	2	2	3	500	2	1	2	2	1	1	1	1	2	1	1	1	1	2	1	3	3	1	0	0	0		1	1	1	0	0	0	0	0	1	0	1							1	1	0	0
102	20	2	2	1	2	200	2	2	2	0	1	1	1	1	6	2	0	1	1	4	1	3	3	0	0	0	0		0	0										0	0	0	0	1	1	0	0	1	1
84	19	1	2	1	1	200	1	1	0	2	0	1	1	1	1	1	1	1	1	3	1	2	1	1	1	0	0		1	1	0	0	0	0	0	0	1	0	2							0	1	0	0
202	19	1	1	1	2	300	2	1	2	2	1	1	1	1	3	1	1	1	1	4	1	1	3	0	0	0	0		0	0										0	1	0	0	0	0	0	0	0	0
438	20	1	2	1	3	300	2	0	0	2	0	1	1	1	4	1	1	1	1	4	1	1	1	0	0	0	0		0	0										0	0	0	0	0	0	0	0	1	0
149	20	2	2	2	3	1300	5	1	3	1	1	1	1	1	4	1	1	1	1	1	1	2	3	1	0	1	1	2	1	1	0	1	1	0	0	1	0	0	2							2	1	1	1
451	19	2	2	1	2	300	2	1	2	1	1	1	1	1	3	1	0	1	1	4	1	3	3	1	0	1	1	2	1	1	0	1	1	1	0	0	1	0	5							0	1	0	1
129	20	2	1	1	2	200	1	0	1	1	1	1	1	1	1	1	1	1	1	2	1	3	1	1	1	1	1	1	1	1	1	1	1	0	0	1	1	0	4							0	1	1	1
446	20	2	1	2	2	400	2	0	1	0	2	1	1	1	3	1	0	1	1	4	1	3	3	1	1	1	1	1	1	1	1	1	1	0	0	0	1	0	4							1	1	1	1
377	20	2	1	1	2	800	1	3	3	0	1	1	1	1	4	1	1	1	1	4	1	2	2	0	0	1	1	2	1	1	1	1	1	1	0	1	0	0	4							1	1	1	1
226	24	2	1	2	3	200	3	3	2	0	1	1	1	1	2	1	1	1	1	4	1	3	1	0	0	1	1	1	1	1	1	0	0	0	0	1	1	0	2							0	1	1	1
396	19	1	2	1	1	200	2	0	1	1	1	1	1	1	3	1	1	1	1	1	1	3	3	0	1	0	0		0	0										0	0	0	0	0	0	0	0	0	0
487	20	2	1	1	3	2000	5	3	3	0	1	1	1	1	2	1	0	1	1	2	1	3	2	0	0	1	1	2	1	1	1	1	0	1	0	0	1	0	4							2	1	1	1
288	19	2	2	2	3	400	4	1	3	2	2	1	1	1	4	1	0	1	1	4	1	3	4	0	0	1	1	2	1	1	0	1	0	0	0	1	0	0	2							1	1	0	1
512	18	1	2	1	1	200	2	0	2	1	0	1	1	1	3	1	1	1	1	1	1	3	3	0	1	0	0		0	0										0	1	0	0	0	0	0	0	0	0
31	24	2	1	2	3	500	2	1	3	2	1	1	1	1	2	1	1	1	1	4	0	2	2	1	0	1	0	1	1	0										1	0	0	1	1	1	1	0	1	1
157	19	1	2	1	1	300	2	0	0	2	2	1	1	1	3	1	1	1	1	1	1	3	1	1	1	0	0		1	1	0	0	0	0	0	0	1	0	1							0	1	0	0
413	17	1	2	2	1	300	2	1	3	0	1	1	1	1	3	1	1	1	1	4	1	2	3	1	1	0	0		0	0										0	1	0	0	0	0	0	0	0	0
517	19	1	1	2	1	1000	2	2	3	1	0	1	1	1	6	1	1	1	1	2	1	1	3	0	1	0	0		0	0										0	1	0	1	0	0	2	0	0	0
494	23	2	1	1	1	200	3	3	3	0	1	2	1	1	5	3	1	1	1	2	1	2	1	0	1	1	1	2	1	1	0	0	1	0	0	0	0	0	2							0	1	1	1
467	22	2	1	2	2	700	5	1	3	0	1	1	1	1	5	2	1	1	1	4	1	3	3	0	0	1	1	1	1	1	1	1	1	0	0	0	1	0	3							1	1	1	1
367	20	2	1	1	1	200	2	2	3	2	1	1	1	1	2	1	1	1	1	3	1	2	3	1	1	1	1	1	1	1	1	1	1	1	0	1	1	0	3							0	1	1	1
473	19	1	2	2	2	200	2	1	2	2	1	1	1	1	1	1	1	1	1	2	1	1	1	1	1	0	0		1	1	0	0	0	0	0	0	1	0	1							0	1	0	0
395	20	1	2	2	2	1000	5	2	1	0	2	1	1	1	2	1	1	1	1	2	1	1	1	0	0	0	0		0	0										1	1	0	1	0	0	2	0	1	0
216	17	2	2	2	3	400	4	1	2	2	1	1	1	1	4	1	0	1	1	4	1	3	4	0	0	1	1	1	1	1	0	1	1	0	0	1	0	0	2							1	1	0	1
145	24	2	1	2	1	300	2	1	2	2	1	2	1	1	1	1	1	1	1	1	1	3	3	1	1	1	1	1	1	1	1	0	0	0	0	1	1	0	4							0	1	1	1
242	20	2	1	1	2	800	2	3	3	0	1	1	1	1	3	1	0	1	1	4	1	3	3	1	0	1	1	1	1	1	1	1	1	1	0	0	1	0	3							1	1	1	1
385	24	1	2	1	3	1000	2	2	3	0	1	1	1	1	5	1	1	1	1	1	1	1	3	0	1	0	0		0	0										1	0	0	0	0	0	2	0	1	0
324	22	2	1	2	1	800	5	1	1	2	2	1	1	1	2	1	1	1	1	4	1	2	2	1	0	0	0		0	0										1	0	0	1	1	1	1	0	1	1
518	19	2	1	1	1	400	2	1	2	2	1	1	1	1	3	1	0	1	1	4	0	5		0	1	0	0		0	0										1	1	0	0	0	0	1	0	0	1
7	20	1	2	1	1	1000	2	2	2	0	1	1	1	1	1	2	0	1	1	4	0	5		1	1	0	0		0	0										1	1	0	0	1	1	2	0	1	0
400	22	2	1	1	2	300	1	3	3	0	1	1	1	1	2	1	1	1	1	3	1	3	3	1	1	1	1	1	1	1	1	0	0	0	0	1	1	0	3							0	1	1	1
315	21	1	2	1	2	700	4	3	3	0	1	1	1	1	2	1	1	1	1	4	0	5		1	1	1	0	1	1	1	1	0	0	0	0	0	1	0	4							1	1	1	0
28	18	2	1	1	1	500	2	1	3	2	1	1	1	1	6	2	0	1	1	1	1	3	3	0	0	0	0		0	0										0	1	0	1	1	1	1	0	0	1
325	22	1	1	2	3	1000	6	0	2	2	1	5	1	1	2	1	1	1	1	2	1	1	3	1	0	0	0		0	0										0	0	0	0	1	1	2	0	1	0
16	22	1	1	2	1	200	2	0	2	2	1	1	1	1	2	1	1	1	1	2	1	1	1	1	0	0	0		0	0										1	1	0	0	0	0	0	0	1	0
85	20	2	1	2	2	1000	5	3	3	0	1	1	1	1	4	1	1	1	1	4	1	3	3	0	0	1	1	1	1	1	1	1	1	1	1	1	0	0	3							2	1	1	1
248	20	2	2	2	3	200	2	0	1	2	1	1	1	1	3	1	1	1	1	4	1	3	2	0	1	0	0		0	0										1	1	0	0	0	0	0	0	1	1
65	21	1	1	1	2	300	2	1	2	2	1	1	1	1	2	1	1	1	1	2	1	3	3	1	0	0	0		0	0										0	1	0	1	0	0	0	0	1	0
76	19	2	1	2	1	300	2	1	3	2	1	1	1	1	3	1	0	1	1	4	0	5		0	1	0	0		1	1	1	0	0	0	0	0	1	0	5							0	1	0	1
106	17	1	1	2	3	300	5	1	1	2	0	1	1	1	1	1	0	1	1	1	1	3	3	1	1	0	0		1	1	1	0	0	0	0	0	0	0	1							0	1	0	0
116	20	1	1	1	1	1000	5	3	2	0	1	1	1	1	2	1	0	1	1	1	1	3	3	0	1	0	0		0	0										1	0	0	1	0	0	2	0	1	0
370	22	2	1	1	2	200	5	3	3	0	1	1	1	1	3	1	1	1	1	4	1	1	3	1	1	0	0		1	1	0	0	0	0	0	0	0	0	3							0	1	1	1
519	21	1	2	1	2	700	5	1	3	2	1	1	1	1	2	1	0	0	1	4	0	5		1	1	1	1	1	1	1	1	0	0	0	0	1	1	0	3							1	1	1	0
457	20	2	2	1	3	500	2	2	1	1	0	1	1	1	1	1	1	1	1	1	1	1	1	1	1	1	1	2	1	1	1	1	1	0	0	0	1	1	2							1	1	1	1
289	17	1	2	1	3	200	2	1	3	0	1	1	1	1	1	1	1	1	1	1	1	1	3	1	1	0	0		0	0										1	0	0	0	0	0	0	0	0	0
357	23	2	1	2	1	300	2	1	3	2	0	1	1	1	2	1	1	1	1	3	1	2	1	1	1	1	1	1	1	1	0	1	1	1	0	0	1	0	3							0	1	1	1
15	17	2	1	1	2	200	5	2	3	2	2	1	1	1	3	1	1	1	1	2	1	3	3	0	0	0	0		1	1	1	0	0	0	0	0	1	0	1							0	1	0	1
143	18	1	1	1	1	200	2	2	3	0	1	1	1	1	3	1	1	1	1	4	1	1	1	0	0	0	0		1	1	1	0	0	0	0	0	1	0	3							0	1	0	0
326	21	2	1	1	2	300	2	1	3	2	1	1	1	1	2	1	1	1	1	3	1	1	1	1	1	0	0		0	0										0	0	0	0	0	0	0	0	1	1
383	23	2	1	2	3	200	2	0	1	0	1	1	1	1	3	1	0	0	1	4	0	5		1	1	1	1	2	1	1	1	0	1	1	0	1	1	1	2							0	1	1	1
207	21	2	2	2	2	200	5	0	1	2	1	1	1	1	3	1	0	1	1	4	1	2	3	0	1	1	1	1	1	1	1	0	0	1	0	1	1	0	2							0	1	1	1
423	19	1	2	2	2	200	2	0	2	2	1	1	1	1	2	1	1	1	1	4	0	5		1	1	0	0		0	0										0	1	0	1	0	0	0	0	0	0
112	24	2	1	1	2	200	1	0	0	2	2	1	1	1	2	1	1	1	1	4	0	1	3	0	1	1	1	1	1	1	1	1	1	1	0	1	1	0	2							0	1	1	1
243	19	2	1	1	3	200	1	2	2	1	2	1	1	1	5	2	0	1	1	2	1	3	3	0	0	0	0		0	0										0	0	0	1	1	1	0	0	0	1
260	22	1	2	1	2	300	2	1	1	1	0	1	1	1	3	1	1	1	1	1	1	3	3	1	1	0	0		1	1	1	0	0	0	0	0	1	0	3							0	1	1	0
183	24	2	1	2	3	300	2	3	3	0	1	2	1	1	1	1	1	1	1	1	1	3	3	1	1	1	1	1	1	1	1	0	0	0	0	1	1	1	4							0	1	1	1
271	19	1	1	2	1	200	2	0	1	2	1	1	1	1	4	1	1	1	1	4	1	1	3	1	0	0	0		1	1	1	0	0	0	0	0	0	0	3							0	1	0	0
392	21	2	1	1	3	400	1	1	1	1	2	1	1	1	1	1	1	1	1	1	1	1	4	1	1	0	0		0	0										0	1	0	0	1	1	1	0	1	1
515	20	1	2	1	3	300	2	0	0	2	2	1	1	1	4	1	1	1	1	4	1	1	1	0	0	0	0		0	0										1	1	0	0	0	0	0	0	1	0
470	21	1	1	2	3	300	5	2	3	1	1	1	1	1	2	1	1	1	1	1	1	3	3	1	0	0	0		0	0										0	1	0	1	1	1	0	0	1	0
18	19	2	1	1	2	200	2	1	2	2	1	1	1	1	2	1	1	1	1	2	1	2	3	0	1	1	1	2	1	1	1	1	1	1	0	0	1	1	5							0	1	0	1
407	17	2	1	1	2	400	6	2	3	0	2	1	1	1	3	1	1	1	1	3	1	3	1	0	0	0	0		0	0										0	1	0	0	0	0	1	0	0	1
330	22	2	1	1	3	200	6	3	3	0	1	2	1	1	6	2	1	1	1	2	1	1	3	1	1	1	1	1	1	1	1	0	1	1	0	0	1	0	3							0	1	1	1
350	23	2	1	1	1	300	3	2	3	2	1	1	1	1	3	1	1	1	1	2	1	3	2	1	1	1	1	1	1	1	1	1	1	0	0	1	1	0	1							0	1	1	1
64	17	2	2	1	3	400	3	3	3	0	1	1	1	1	2	1	1	1	1	2	1	2	2	0	0	0	0		0	0										0	0	0	1	0	0	1	0	0	1
60	23	2	1	2	2	600	2	0	1	0	1	1	1	1	3	1	1	1	1	4	0	5		0	1	1	1	1	1	1	1	0	0	0	0	0	1	0	4							1	1	1	1
456	17	2	1	2	3	800	5	1	3	2	1	1	1	1	3	1	1	1	1	4	1	1	1	1	0	0	0		1	1	1	0	0	0	0	0	1	0	3							1	1	0	1
33	20	2	2	2	2	800	5	1	2	2	1	1	1	1	3	1	1	1	1	1	1	3	1	1	0	1	1	2	1	1	0	0	1	1	0	1	0	0	3							1	1	1	1
388	24	2	1	1	1	200	2	1	3	2	1	1	1	1	3	1	1	1	1	1	1	1	3	1	0	0	0		1	1	0	0	0	0	0	0	1	0	2							0	1	1	1
90	20	2	1	2	1	400	2	2	3	2	1	1	1	1	2	1	1	1	1	1	1	3	3	0	0	1	1	1	1	1	1	0	1	1	1	0	1	0	4							1	1	1	1
71	19	2	2	2	2	500	2	2	2	0	0	1	1	1	3	1	0	1	1	4	1	3	3	0	0	0	0		0	0										1	1	0	0	0	0	1	0	0	1
39	20	2	1	1	1	1000	1	1	3	1	0	1	1	1	2	1	0	1	1	4	0	3	4	1	1	1	1	1	1	1	1	0	1	1	1	1	1	1	3							2	1	1	1
481	19	1	1	1	2	200	2	1	2	2	0	1	1	1	3	1	1	1	1	1	1	2	3	1	0	0	0		0	0										1	0	0	0	0	0	0	0	0	0
166	22	2	1	2	2	700	5	0	0	2	2	1	1	1	2	1	1	1	1	4	1	3	3	1	1	0	0		0	0										0	1	0	1	1	1	1	0	1	1
234	20	2	2	1	3	400	2	0	1	1	2	1	1	1	3	1	1	1	1	4	1	3	1	1	1	1	1	1	1	1	1	1	0	1	0	0	1	1	3							1	1	1	1
397	21	1	1	2	2	200	2	1	1	0	1	1	1	1	2	1	1	1	1	2	1	1	3	1	0	1	0	1	1	1	1	0	0	0	0	0	1	1	5							0	1	1	0
465	21	2	1	1	1	800	2	1	1	2	0	1	1	1	1	1	1	1	1	4	0	5		1	1	1	1	1	1	1	1	1	1	1	0	1	1	1	3							1	1	1	1
150	21	1	1	1	3	400	2	1	1	1	1	1	1	1	3	1	0	1	1	4	1	2	3	0	1	1	1	1	1	1	1	0	0	0	0	1	1	1	3							1	1	1	0
443	20	2	1	1	2	400	2	3	3	0	1	1	1	1	1	1	1	0	1	2	0	1	3	1	1	1	1	1	1	1	1	1	1	0	0	1	1	0	2							1	1	1	1
469	22	1	1	2	3	1000	6	3	3	0	1	5	1	1	2	1	1	1	1	2	1	1	3	1	0	0	0		0	0										1	0	0	0	1	1	2	0	1	0
240	21	2	1	2	2	300	5	2	3	0	0	1	1	1	3	1	1	1	1	3	1	1	2	1	1	1	1	1	1	1	1	1	1	1	0	1	1	1	1							0	1	1	1
368	23	2	2	1	2	500	2	0	1	1	2	1	1	1	5	2	1	1	1	2	1	3	3	1	1	1	1	1	1	1	1	1	1	1	0	0	1	0	3							1	1	1	1
504	22	2	2	2	1	600	2	0	1	2	1	5	1	1	3	1	1	1	1	3	1	3	3	1	1	1	1	1	1	1	1	0	0	0	0	0	1	0	2							1	1	1	1
1	20	2	1	1	1	200	2	1	3	2	1	1	1	1	6	1	1	1	1	1	1	4	4	1	0	0	0		1	1	0	0	0	0	0	0	0	0	5							0	1	1	1
344	19	2	1	1	3	200	4	1	3	2	1	1	1	1	2	1	1	1	1	4	0	3	2	1	0	0	0		1	1	0	0	0	0	0	0	0	0	4							0	1	0	1
321	23	2	1	2	3	400	2	1	3	2	1	2	1	1	6	2	1	1	1	4	1	2	3	1	1	1	1	1	1	1	1	0	1	1	0	0	1	0	5							1	1	1	1
26	20	1	2	1	2	200	2	1	2	1	0	1	1	1	3	1	1	1	1	2	1	3	1	1	1	0	0		0	0										0	1	0	0	0	0	0	0	1	0
265	19	2	1	2	2	1300	2	1	1	2	1	1	1	1	2	1	1	1	1	4	1	3	3	0	0	1	1	1	1	1	1	1	1	1	0	0	1	1	3							2	1	0	1
323	24	2	2	2	3	400	4	0	1	0	1	1	1	1	4	1	0	1	1	4	1	3	4	0	0	1	1	1	1	0										1	1	0	1	1	1	1	0	1	1
516	20	1	2	2	2	500	2	0	1	1	0	1	1	1	5	1	1	1	1	4	1	1	2	0	0	0	0		0	0										1	0	0	0	0	0	1	0	1	0
159	21	2	1	1	3	400	2	1	1	2	2	1	1	1	3	1	1	1	1	1	1	1	3	0	1	1	1	1	1	1	1	1	1	1	0	1	1	1	3							1	1	1	1
432	24	2	1	2	2	300	2	3	3	0	1	1	1	1	2	1	1	1	1	4	0	3	3	0	1	1	1	1	1	1	1	0	0	0	0	1	1	1	3							0	1	1	1
374	17	2	1	2	3	300	2	2	3	0	1	1	1	1	6	2	0	1	1	4	1	4	3	0	1	0	0		0	0										0	1	0	1	1	1	0	0	0	1
376	17	1	1	1	1	200	2	0	2	2	1	1	1	1	2	1	1	1	1	2	1	1	1	1	0	0	0		0	0										1	1	0	0	0	0	0	0	0	0
254	24	2	1	1	3	200	5	3	3	0	1	2	1	1	1	1	1	1	1	4	0	5		1	1	1	1	2	1	1	1	0	1	1	1	0	1	0	2							0	1	1	1
454	19	1	2	2	3	400	2	0	1	0	1	1	1	1	6	1	1	1	1	1	1	1	1	0	1	0	0		1	1	1	0	0	0	0	0	1	0	3							1	1	0	0
304	24	1	1	1	1	200	2	1	0	0	0	2	1	1	1	2	1	1	1	2	1	2	2	1	1	1	1	2	1	1	1	0	0	0	0	1	1	0	5							0	1	1	0
138	21	2	1	1	1	800	2	1	1	2	2	1	1	1	1	1	1	1	1	4	0	5		1	1	0	0		0	0										1	0	0	0	1	1	1	0	1	1
48	19	1	2	2	1	300	2	1	2	2	1	1	1	1	6	2	1	1	1	1	1	1	3	0	0	0	0		0	0										1	0	0	1	0	0	0	0	0	0
172	20	1	2	1	3	500	2	2	3	0	1	1	1	1	5	1	1	1	1	1	1	1	3	0	1	0	0		0	0										1	0	0	0	0	0	1	0	1	0
61	23	2	1	1	1	300	2	3	3	0	1	1	1	1	3	1	1	1	1	1	1	1	2	1	1	1	1	1	1	1	1	1	1	1	0	1	1	0	4							0	1	1	1
117	20	1	1	1	1	300	2	3	3	0	1	1	1	1	2	1	1	1	1	4	0	5		1	1	1	1	1	1	1	1	0	0	0	0	1	1	1	2							0	1	1	0
302	17	2	1	1	2	400	6	2	3	2	1	1	1	1	3	1	1	1	1	3	1	3	1	0	0	0	0		0	0										1	0	0	0	0	0	1	0	0	1
188	20	2	2	1	1	300	2	1	1	2	2	1	1	1	1	1	1	1	1	2	1	1	1	1	1	0	0		0	0										1	1	0	0	0	0	0	0	1	1
238	19	2	1	2	1	200	2	0	1	0	1	1	1	1	2	1	1	1	1	4	0	1	3	1	0	1	1	1	1	1	1	1	0	0	0	1	1	0	2							0	1	0	1
200	19	2	1	2	2	300	2	2	2	2	0	1	1	1	3	1	0	1	1	1	1	4	3	0	1	0	0		1	1	0	0	0	0	0	0	0	0	2							0	1	0	1
133	19	1	2	2	1	200	2	2	3	0	1	1	1	1	2	1	1	1	1	3	1	1	3	0	1	0	0		0	0										0	0	0	1	0	0	0	0	0	0
97	24	2	2	2	1	400	2	1	3	2	1	1	1	1	3	1	0	0	1	4	0	5		0	1	1	1	2	1	1	1	1	1	1	0	0	1	1	3							1	1	1	1
132	23	1	2	2	3	1000	5	3	3	0	1	1	1	1	3	1	1	1	1	3	1	3	3	0	0	1	1	1	1	1	1	0	0	0	0	1	1	1	4							2	1	1	0
78	19	1	2	2	1	1000	1	1	1	2	0	1	1	1	2	1	0	1	1	4	0	1	3	0	0	0	0		1	1	1	0	0	0	0	0	0	0	3							2	1	0	0
471	20	2	2	1	2	700	2	1	3	1	1	1	1	1	3	1	0	1	1	4	0	5		0	1	1	1	1	1	1	0	1	1	0	0	1	1	0	3							1	1	1	1
105	23	2	2	2	2	300	1	0	1	0	1	1	1	1	6	3	1	1	1	4	1	2	3	1	1	1	1	1	1	1	1	1	0	1	0	0	1	1	3							0	1	1	1
416	21	2	1	1	3	400	2	0	1	2	1	1	1	1	3	1	1	1	1	1	1	1	3	0	1	0	0		0	0										1	1	0	0	0	0	1	0	1	1
247	24	2	1	1	3	200	2	0	1	0	0	1	1	1	3	1	1	1	1	4	1	4	3	0	1	1	1	1	1	1	1	0	0	0	0	1	1	1	2							0	1	1	1
498	20	2	2	1	2	300	2	2	1	1	2	1	1	1	6	2	0	1	1	4	1	3	3	0	0	0	0		0	0										1	0	0	0	0	0	0	0	1	1
131	18	1	1	1	1	300	2	1	3	0	0	1	1	1	3	1	1	1	1	1	1	2	3	1	0	0	0		0	0										1	0	0	0	0	0	0	0	0	0
478	19	2	2	2	2	400	2	1	2	2	1	1	1	1	2	1	1	1	1	4	1	3	3	1	0	1	1	1	1	1	1	1	1	1	0	0	1	1	2							1	1	0	1
403	21	1	1	1	2	400	2	0	1	2	0	1	1	1	4	1	1	1	1	1	1	1	2	1	1	0	0		0	0										0	0	0	0	0	0	1	0	1	0
2	17	2	2	2	2	200	2	3	3	0	1	1	1	1	1	1	1	1	1	4	0	1	2	1	1	0	0		1	1	0	0	0	0	0	0	1	0	3							0	1	0	1
211	22	2	1	2	3	300	3	3	3	0	1	1	1	1	2	1	1	1	1	4	1	3	1	0	0	0	0		0	0										0	0	0	1	0	0	0	0	1	1
389	19	2	2	1	2	200	2	1	2	2	2	1	1	1	2	1	0	1	1	1	1	1	3	1	1	0	0		1	1	0	0	0	0	0	0	0	0	4							0	1	0	1
72	23	2	2	2	2	400	2	2	2	1	0	1	1	1	2	1	0	1	1	3	1	3	1	1	1	1	1	1	1	1	1	0	0	0	0	1	1	0	3							1	1	1	1
152	20	1	2	1	2	600	2	0	2	2	1	1	1	1	3	1	1	1	1	4	1	3	1	0	0	0	0		0	0										0	1	0	1	0	0	1	0	1	0
286	23	1	2	2	3	500	2	0	0	2	1	1	1	0	6	2	1	1	1	2	1	3	3	1	0	1	1	1	1	1	1	0	0	0	0	1	1	1	2							1	1	1	0
194	19	2	1	1	1	400	2	1	2	2	1	1	1	1	3	1	0	0	1	4	0	2	3	0	1	0	0		0	0										0	0	0	1	0	0	1	0	0	1
355	23	1	1	1	3	100	2	0	1	2	1	1	1	1	3	1	0	1	1	1	1	3	4	0	0	1	0	1	1	1	1	0	0	0	0	0	1	0	3							0	1	1	0
12	22	2	1	1	3	400	1	1	3	2	1	1	1	1	3	1	1	0	1	1	0	3	3	1	0	0	0		1	1	1	0	0	0	0	0	1	0	3							1	1	1	1
303	20	2	2	2	3	200	4	2	0	1	0	1	1	1	5	2	0	1	1	4	1	1	4	0	0	0	0		0	0										1	1	0	0	1	1	0	0	1	1
148	22	2	2	2	3	400	4	1	0	2	2	1	1	1	3	1	1	1	1	4	1	3	2	1	1	1	1	1	1	1	1	1	1	0	0	0	1	0	4							1	1	1	1
171	23	1	1	1	2	300	2	2	1	0	1	1	1	1	3	1	1	1	1	4	1	3	4	0	0	1	1	1	1	0										1	0	0	1	1	1	0	0	1	0
336	24	2	2	1	2	700	3	1	3	2	1	1	1	1	1	1	0	1	1	4	0	5		1	1	0	0		1	1	1	0	0	0	0	0	0	0	4							1	1	1	1
399	22	2	2	1	1	300	1	3	3	0	1	2	1	1	5	3	1	0	1	2	0	1	1	1	1	1	1	1	1	1	1	0	1	1	1	0	1	1	4							0	1	1	1
440	21	2	2	2	1	300	5	0	1	1	0	1	1	1	2	1	1	1	1	4	1	1	3	0	0	1	1	1	1	1	1	0	0	1	0	1	1	0	3							0	1	1	1
436	19	2	2	2	2	300	2	1	2	2	1	1	1	1	6	4	0	0	1	1	0	3	3	1	1	0	0		0	0										0	1	0	1	1	1	0	0	0	1
435	19	1	1	2	1	200	5	1	2	2	2	1	1	1	2	1	0	1	1	3	1	3	4	0	0	0	0		0	0										0	1	0	1	0	0	0	0	0	0
347	21	2	1	1	2	200	3	0	1	0	1	1	1	1	1	2	0	1	1	4	0	3	3	1	1	1	1	1	1	1	1	1	1	0	0	1	1	0	2							0	1	1	1
163	18	2	2	2	1	300	5	1	3	1	1	1	1	1	2	1	1	1	1	4	1	1	3	0	0	1	1	1	1	1	1	1	1	1	0	0	1	0	3							0	1	0	1
232	19	1	2	2	3	500	2	0	1	0	1	1	1	1	2	1	1	1	1	2	1	3	3	1	0	1	0	1	1	1	1	0	0	0	0	0	1	1	1							1	1	0	0
224	18	2	1	1	1	400	2	1	3	2	0	1	1	1	4	1	1	1	1	1	1	1	3	1	0	0	0		0	0										1	1	0	0	0	0	1	0	0	1
193	22	1	1	1	1	500	1	1	1	2	0	1	1	1	1	1	1	1	1	4	0	2	1	1	1	1	0	1	1	1	1	0	0	0	0	0	1	1	3							1	1	1	0
155	21	2	1	1	3	300	1	0	1	1	2	1	1	1	3	1	1	1	1	4	1	3	4	0	0	0	0		0	0										1	0	0	0	0	0	0	0	1	1
480	19	1	1	2	2	300	2	2	3	1	1	1	1	1	2	1	1	1	1	1	1	2	2	1	0	0	0		1	1	0	0	0	0	0	0	1	0	3							0	1	0	0
259	21	1	1	2	2	1000	2	2	1	1	0	1	1	1	2	1	1	1	1	1	1	3	3	1	1	0	0		0	0										0	1	0	0	0	0	2	0	1	0
218	19	1	2	2	3	2000	2	1	2	2	0	1	1	1	1	1	0	0	1	4	0	2	3	1	1	0	0		1	1	0	0	0	0	0	0	1	0	2							2	1	0	0
458	20	1	2	2	2	500	2	0	1	2	2	1	1	1	3	1	0	1	1	3	1	3	3	0	0	0	0		0	0										1	0	0	0	0	0	1	0	1	0
196	20	2	1	1	2	800	2	0	1	0	1	1	1	1	3	1	0	1	1	4	1	3	3	1	0	0	0		0	0										1	1	0	0	0	0	1	0	1	1
222	20	1	2	1	1	800	5	0	1	2	2	1	1	1	3	1	1	1	1	4	1	2	3	0	1	1	0	1	1	1	1	0	0	0	0	0	1	0	5							1	1	1	0
359	19	1	1	1	2	200	5	2	3	0	1	1	1	1	3	1	0	1	1	4	1	3	2	0	0	0	0		0	0										1	0	0	0	0	0	0	0	0	0
113	19	1	2	2	3	400	2	0	2	2	1	1	1	1	6	1	1	1	1	1	1	1	1	0	1	0	0		0	0										0	0	0	1	0	0	1	0	0	0
29	19	1	1	2	1	200	2	0	1	0	1	1	1	1	2	1	0	1	1	1	1	2	3	0	1	1	0	1	1	1	1	0	0	0	0	0	1	0	4							0	1	0	0
263	20	2	1	2	1	300	6	2	1	1	2	1	1	1	6	1	1	1	1	1	1	1	3	0	0	0	0		1	1	1	0	0	0	0	0	0	0	3							0	1	1	1
70	22	2	1	1	2	800	2	3	3	0	1	1	1	1	2	1	1	0	1	1	0	3	4	0	1	1	1	1	1	1	1	1	1	1	0	1	1	1	4							1	1	1	1
483	23	2	1	2	2	500	2	0	1	0	1	1	1	1	5	1	1	1	1	4	1	4	3	1	1	1	0	1	1	1	1	0	0	0	0	0	1	0	2							1	1	1	1
299	24	1	1	1	1	700	5	0	0	2	2	2	1	1	3	1	1	1	1	2	1	3	2	1	1	1	0	1	1	1	1	0	0	0	0	0	1	0	1							1	1	1	0
500	19	2	2	1	3	200	1	2	2	2	1	1	1	1	2	1	1	1	1	4	1	1	3	0	0	1	1	1	1	1	1	1	1	1	0	0	1	0	4							0	1	0	1
363	20	1	1	1	1	200	2	1	2	2	0	1	1	1	2	1	1	1	1	4	0	5		1	1	1	1	1	1	1	1	0	0	0	0	1	1	0	2							0	1	1	0
513	19	1	2	1	1	200	1	2	2	1	1	1	1	1	2	1	0	1	1	4	1	1	1	0	1	0	0		0	0										1	1	0	1	0	0	0	0	0	0
309	22	2	1	1	3	500	2	3	3	0	1	1	1	1	4	2	1	1	1	2	1	1	4	0	0	1	1	1	1	1	1	1	1	0	0	1	1	0	2							1	1	1	1
420	21	1	1	1	1	800	2	2	3	0	1	1	1	1	3	1	1	1	1	4	1	1	1	0	0	0	0		0	0										0	1	0	1	1	1	1	0	1	0
387	21	1	1	1	3	200	2	0	1	2	0	1	1	1	6	1	0	1	1	1	1	4	4	0	1	1	0	1	1	1	1	0	0	0	0	0	1	1	4							0	1	1	0
472	20	2	1	2	1	500	2	1	3	0	1	1	1	1	2	1	1	1	1	2	1	1	3	1	1	1	1	1	1	1	1	1	1	1	0	1	1	0	3							1	1	1	1
253	19	1	2	1	1	400	2	2	3	0	1	1	1	1	3	1	1	1	1	1	1	3	1	1	1	0	0		0	0										0	1	0	1	1	1	1	0	0	0
293	20	1	1	1	3	800	5	1	3	2	1	1	1	1	3	1	0	1	1	4	1	1	2	0	0	1	1	1	1	1	1	0	0	0	0	1	1	0	3							1	1	1	0
[truncated: 6 more columns]
